# Supplementary material
Source: PubMed Central journal article supplement (PMC6353671)
Supplement: NIHMS1007126-supplement-SI.pdf [file NIHMS1007126-supplement-SI.pdf]

## Supporting Information for

### **Biophysical Characterization of a Disabled Double Mutant of Soybean Lipoxygenase: The “Undoing” of Precise Substrate Positioning Relative to Metal Cofactor and an Identified Dynamical Network**

Shenshen Hu<sup>#+%/†</sup>, Adam R. Offenbacher<sup>#+%/‡</sup>, Erin M. Thompson<sup>§</sup>, Christine L. Gee<sup>#%/</sup>, Jarett Wilcoxon<sup>Δ</sup>, Cody A. M. Carr<sup>#+%/†</sup>, Daniil M. Prigozhin<sup>#%/†</sup>, Vanessa Yang<sup>+</sup>, Tom Alber<sup>#%/†</sup>, R. David Britt<sup>Δ</sup>, James S. Fraser<sup>§</sup>, Judith Klinman<sup>#+%/\*</sup>

<sup>#</sup>California Institute for Quantitative Biosciences, <sup>+</sup>Department of Chemistry, <sup>%</sup>Department of Molecular and Cell Biology, University of California, Berkeley, California 94720, United States

<sup>‡</sup>Department of Chemistry, East Carolina University, Greenville, NC 27858

<sup>§</sup>Department of Bioengineering and Therapeutic Science, University of California, San Francisco, San Francisco, California 94158, United States

<sup>Δ</sup>Department of Chemistry, University of California, Davis, California 95695, United States

**Table S1.** Kinetic parameters of SLO and mutants in 0.1 M borate (pH 9) at 30°C

| Enzyme                           | $k_{\text{cat}}$ (s <sup>-1</sup> ) | $E_{\text{a(H)}}^f$ (kcal/mol) | $^Dk_{\text{cat}}$ | $\Delta E_{\text{a}}^g$<br>(kcal/mol) |
|----------------------------------|-------------------------------------|--------------------------------|--------------------|---------------------------------------|
| WT <sup>a</sup>                  | 297 (12)                            | 2.1 (0.2)                      | 81 (5)             | 0.9 (0.2)                             |
| I553V <sup>b</sup>               | 91 (5)                              | 2.4 (0.5)                      | 77 (6)             | 2.6 (0.5)                             |
| I553L <sup>b</sup>               | 273 (10)                            | 0.4 (0.7)                      | 81 (3)             | 3.4 (0.6)                             |
| I553A <sup>a</sup>               | 280 (10)                            | 1.9 (0.2)                      | 93 (4)             | 4.0 (0.3)                             |
| I553G <sup>b</sup>               | 58 (4)                              | 0.03 (0.04)                    | 178 (16)           | 5.3 (0.7)                             |
| L546A <sup>a</sup>               | 4.8 (0.6)                           | 4.1 (0.4)                      | 93 (9)             | 1.9 (0.6)                             |
| L754A <sup>a</sup>               | 0.31 (0.02)                         | 4.1 (0.3)                      | 112 (11)           | 2.0 (0.5)                             |
| L546A/L754A<br>(DM) <sup>c</sup> | 0.025 (0.01)                        | 9.9 (0.2)                      | 692 (43)           | 0.3 (0.7)                             |
| L546A/I553A <sup>d</sup>         | 2.21 (0.09)                         | 3.8 (0.4)                      | 128 (3)            | 2.8 (0.4)                             |
| L754A/I553A <sup>d</sup>         | 0.56 (0.03)                         | 6.9 (0.2)                      | 85 (7)             | 3.9 (0.5)                             |

<sup>a</sup>From Ref <sup>1</sup>.

<sup>b</sup>From Ref <sup>2</sup>.

<sup>c</sup>The values of  $k_{\text{cat}}$ ,  $^Dk_{\text{cat}}$  and  $\Delta E_{\text{a}}$  are From Ref <sup>3</sup>, while the  $E_{\text{a(H)}}$  value is from Ref <sup>4</sup>.

<sup>d</sup>From Ref <sup>5</sup>.

<sup>e</sup>From Ref <sup>6</sup>.

<sup>f</sup>Determined from the temperature dependence of  $k_{\text{cat}}$ .

<sup>g</sup>. $\Delta E_{\text{a}}=E_{\text{a(D)}} - E_{\text{a(H)}}$ .

<sup>h</sup>These are computed according to the vibronically non-adiabatic multi-dimensional model, Ref <sup>3</sup>.

**Table S2.** Weighted average rates of HDX (in min<sup>-1</sup>)

| 144-160 |               |               |               |               |               |
|---------|---------------|---------------|---------------|---------------|---------------|
| Temp    | WT            | I553G         | L546A         | L754A         | DM            |
| 10      | 0.027 (0.004) | 0.03 (0.004)  | 0.019 (0.004) | 0.018 (0.004) | 0.020 (0.004) |
| 20      | 0.051 (0.008) | 0.054 (0.013) | 0.047 (0.01)  | 0.038 (0.008) | 0.055 (0.012) |
| 25      | 0.071 (0.014) | 0.079 (0.015) | 0.043 (0.01)  | 0.079 (0.025) | 0.076 (0.016) |
| 30      | 0.066 (0.016) | 0.10 (0.03)   | 0.072 (0.014) | 0.048 (0.009) | 0.055 (0.018) |
| 40      | 0.20 (0.05)   | 0.26 (0.09)   | 0.25 (0.06)   | 0.076 (0.03)  | 0.25 (0.16)   |
| 167-185 |               |               |               |               |               |
| Temp    | WT            | I553G         | L546A         | L754A         | DM            |
| 10      | 0.076 (0.03)  | 0.046 (0.02)  | 0.039 (0.01)  | 0.064 (0.03)  | 0.017 (0.007) |
| 20      | 0.058 (0.03)  | 0.016 (0.01)  | 0.025 (0.01)  | 0.021 (0.007) | 0.058 (0.02)  |
| 25      | 0.016 (0.005) | 0.022 (0.006) | 0.008 (0.007) | 0.004 (0.006) | 0.029 (0.01)  |
| 30      | 0.018 (0.008) | 0.020 (0.007) | 0.014 (0.005) | 0.015 (0.004) | 0.010 (0.005) |
| 40      | 0.027 (0.007) | 0.024 (0.003) | 0.025 (0.004) | 0.019 (0.004) | 0.016 (0.003) |
| 186-206 |               |               |               |               |               |
| Temp    | WT            | I553G         | L546A         | L754A         | DM            |
| 10      | 0.076 (0.02)  | 0.065 (0.02)  | 0.047 (0.01)  | 0.040 (0.009) | 0.044 (0.01)  |
| 20      | 0.077 (0.02)  | 0.080 (0.03)  | 0.050 (0.01)  | 0.052 (0.01)  | 0.077 (0.02)  |
| 25      | 0.054 (0.01)  | 0.073 (0.02)  | 0.23 (0.1)    | 0.068 (0.03)  | 0.12 (0.04)   |
| 30      | 0.09 (0.1)    | 0.091 (0.03)  | 0.050 (0.01)  | 0.040 (0.009) | 0.30 (0.15)   |
| 40      | 0.13 (0.05)   | 0.040 (0.01)  | 0.12 (0.04)   | 0.030 (0.01)  | 0.37 (0.15)   |
| 212-238 |               |               |               |               |               |
| Temp    | WT            | I553G         | L546A         | L754A         | DM            |
| 10      | 0.14 (0.02)   | N.C.          | 0.098 (0.03)  | 0.091 (0.02)  | N.C.          |
| 20      | 0.32 (0.1)    | N.C.          | 0.36 (0.07)   | 0.29 (0.08)   | N.C.          |
| 25      | 0.37 (0.1)    | N.C.          | 0.44 (0.1)    | 0.67 (0.2)    | N.C.          |
| 30      | 0.96 (0.3)    | N.C.          | 0.58 (0.2)    | 0.64 (0.3)    | N.C.          |
| 40      | 0.060 (0.03)  | N.C.          | 0.025 (0.01)  | 0.015 (0.01)  | N.C.          |
| 239-256 |               |               |               |               |               |
| Temp    | WT            | I553G         | L546A         | L754A         | DM            |
| 10      | N.D.          | N.D.          | N.D.          | N.D.          | N.D.          |
| 20      | N.D.          | N.D.          | N.D.          | N.D.          | N.D.          |
| 25      | N.D.          | N.D.          | N.D.          | N.D.          | N.D.          |
| 30      | N.D.          | N.D.          | N.D.          | N.D.          | N.D.          |
| 40      | N.D.          | N.D.          | N.D.          | N.D.          | N.D.          |
| 257-273 |               |               |               |               |               |
| Temp    | WT            | I553G         | L546A         | L754A         | DM            |
| 10      | N.D.          | N.D.          | N.D.          | N.D.          | N.D.          |
| 20      | N.D.          | N.D.          | N.D.          | N.D.          | N.D.          |
| 25      | N.D.          | N.D.          | N.D.          | N.D.          | N.D.          |
| 30      | N.D.          | N.D.          | N.D.          | N.D.          | N.D.          |
| 40      | N.D.          | N.D.          | N.D.          | N.D.          | N.D.          |
| 274-283 |               |               |               |               |               |

| Temp    | WT            | I553G         | L546A         | L754A         | DM            |
|---------|---------------|---------------|---------------|---------------|---------------|
| 10      | N.D.          | N.D.          | N.D.          | N.D.          | N.D.          |
| 20      | N.D.          | N.D.          | N.D.          | N.D.          | N.D.          |
| 25      | N.D.          | N.D.          | N.D.          | N.D.          | N.D.          |
| 30      | N.D.          | N.D.          | N.D.          | N.D.          | N.D.          |
| 40      | N.D.          | N.D.          | N.D.          | N.D.          | N.D.          |
| 284-296 |               |               |               |               |               |
| Temp    | WT            | I553G         | L546A         | L754A         | DM            |
| 10      | 0.026 (0.005) | 0.025 (0.006) | N.C.          | N.C.          | 0.018 (0.005) |
| 20      | 0.065 (0.01)  | 0.21 (0.06)   | N.C.          | N.C.          | 0.056 (0.009) |
| 25      | 0.11 (0.03)   | 0.11 (0.04)   | N.C.          | N.C.          | 0.19 (0.1)    |
| 30      | 0.20 (0.1)    | 0.18 (0.14)   | N.C.          | N.C.          | 0.34 (0.2)    |
| 40      | 0.38 (0.1)    | 0.38 (0.18)   | N.C.          | N.C.          | 0.44 (0.25)   |
| 284-299 |               |               |               |               |               |
| Temp    | WT            | I553G         | L546A         | L754A         | DM            |
| 10      | 0.041 (0.006) | 0.30 (0.11)   | 0.09 (0.02)   | 0.027 (0.005) | 0.063 (0.001) |
| 20      | 0.048 (0.006) | 0.41 (0.08)   | 0.25 (0.06)   | 0.036 (0.005) | 0.091 (0.01)  |
| 25      | 0.08 (0.04)   | 0.33 (0.08)   | 0.39 (0.08)   | 0.10 (0.03)   | 0.18 (0.05)   |
| 30      | 0.11 (0.03)   | 0.48 (0.22)   | 0.84 (0.22)   | 0.13 (0.02)   | 0.18 (0.04)   |
| 40      | 0.29 (0.08)   | 0.60 (0.22)   | 0.88 (0.11)   | 0.30 (0.09)   | 0.57 (0.14)   |
| 297-305 |               |               |               |               |               |
| Temp    | WT            | I553G         | L546A         | L754A         | DM            |
| 10      | 0.10 (0.02)   | 0.50 (0.12)   | 0.39 (0.11)   | 0.047 (0.02)  | 0.15 (0.04)   |
| 20      | 0.10 (0.02)   | 0.92 (0.16)   | 0.53 (0.08)   | 0.088 (0.01)  | 0.38 (0.09)   |
| 25      | 0.15 (0.06)   | 1.6 (0.3)     | 0.92 (0.18)   | 0.33 (0.08)   | 0.59 (0.2)    |
| 30      | 0.58 (0.16)   | 1.7 (0.5)     | 1.8 (0.3)     | 0.27 (0.06)   | 1.07 (0.3)    |
| 40      | 0.81 (0.19)   | 4.4 (3.0)     | 2.6 (0.4)     | 0.45 (0.1)    | 1.9 (0.4)     |
| 306-316 |               |               |               |               |               |
| Temp    | WT            | I553G         | L546A         | L754A         | DM            |
| 10      | 0.14 (0.04)   | 0.49 (0.12)   | 0.46 (0.11)   | 0.052 (0.02)  | 0.18 (0.05)   |
| 20      | 0.09 (0.01)   | 0.90 (0.10)   | 0.61 (0.09)   | 0.10 (0.02)   | 0.26 (0.04)   |
| 25      | 0.15 (0.06)   | 0.98 (0.16)   | 0.69 (0.08)   | 0.33 (0.08)   | 0.45 (0.1)    |
| 30      | 0.48 (0.2)    | 1.2 (0.3)     | 1.7 (0.22)    | 0.22 (0.05)   | 0.92 (0.3)    |
| 40      | 0.44 (0.11)   | 1.7 (0.9)     | 1.8 (0.21)    | 0.34 (0.06)   | 1.3 (0.3)     |
| 316-334 |               |               |               |               |               |
| Temp    | WT            | I553G         | L546A         | L754A         | DM            |
| 10      | 0.024 (0.004) | 0.052 (0.007) | 0.032 (0.006) | 0.015 (0.004) | 0.024 (0.004) |
| 20      | 0.016 (0.003) | 0.058 (0.013) | 0.051 (0.008) | 0.019 (0.003) | 0.040 (0.008) |
| 25      | 0.012 (0.003) | 0.056 (0.008) | 0.056 (0.01)  | 0.019 (0.006) | 0.041 (0.01)  |
| 30      | 0.019 (0.002) | 0.087 (0.02)  | 0.21 (0.06)   | 0.021 (0.004) | 0.14 (0.06)   |
| 40      | 0.030 (0.006) | 0.060 (0.018) | 0.30 (0.09)   | 0.026 (0.004) | 0.067 (0.02)  |
| 316-338 |               |               |               |               |               |
| Temp    | WT            | I553G         | L546A         | L754A         | DM            |
| 10      | 0.013 (0.004) | 0.033 (0.005) | 0.021 (0.004) | 0.011 (0.003) | 0.013 (0.003) |

|    |               |               |               |               |               |
|----|---------------|---------------|---------------|---------------|---------------|
| 20 | 0.017 (0.003) | 0.030 (0.006) | 0.035 (0.005) | 0.017 (0.003) | 0.030 (0.006) |
| 25 | 0.019 (0.003) | 0.042 (0.005) | 0.033 (0.005) | 0.017 (0.004) | 0.037 (0.01)  |
| 30 | 0.026 (0.003) | 0.073 (0.02)  | 0.077 (0.02)  | 0.025 (0.0 5) | 0.029 (0.006) |
| 40 | 0.049 (0.009) | 0.092 (0.02)  | 0.20 (0.05)   | 0.033 (0.006) | 0.081 (0.02)  |

317-334

| Temp | WT            | I553G         | L546A         | L754A         | DM            |
|------|---------------|---------------|---------------|---------------|---------------|
| 10   | 0.009 (0.004) | 0.046 (0.005) | 0.029 (0.005) | 0.010 (0.002) | 0.024 (0.002) |
| 20   | 0.013 (0.007) | 0.067 (0.013) | 0.047 (0.006) | 0.016 (0.004) | 0.038 (0.006) |
| 25   | 0.015 (0.006) | 0.058 (0.010) | 0.061 (0.013) | 0.018 (0.005) | 0.041 (0.008) |
| 30   | 0.014 (0.003) | 0.053 (0.008) | 0.18 (0.05)   | 0.019 (0.004) | 0.092 (0.06)  |
| 40   | 0.022 (0.006) | 0.056 (0.017) | 0.26 (0.08)   | 0.025 (0.005) | 0.21 (0.08)   |

347-355

| Temp | WT   | I553G | L546A | L754A | DM   |
|------|------|-------|-------|-------|------|
| 10   | N.D. | N.D.  | N.D.  | N.D.  | N.C. |
| 20   | N.D. | N.D.  | N.D.  | N.D.  | N.C. |
| 25   | N.D. | N.D.  | N.D.  | N.D.  | N.C. |
| 30   | N.D. | N.D.  | N.D.  | N.D.  | N.C. |
| 40   | N.D. | N.D.  | N.D.  | N.D.  | N.C. |

362-388

| Temp | WT           | I553G | L546A        | L754A         | DM            |
|------|--------------|-------|--------------|---------------|---------------|
| 10   | 0.068 (0.01) | N.C.  | 0.034 (0.01) | 0.033 (0.006) | 0.032 (0.006) |
| 20   | 0.12 (0.03)  | N.C.  | 0.085 (0.02) | 0.073 (0.01)  | 0.079 (0.02)  |
| 25   | 0.14 (0.03)  | N.C.  | 0.25 (0.07)  | 0.28 (0.1)    | 0.21 (0.08)   |
| 30   | 0.55 (0.2)   | N.C.  | 0.27 (0.09)  | 0.19 (0.04)   | 0.42 (0.09)   |
| 40   | 0.96 (0.3)   | N.C.  | 0.76 (0.1)   | 0.63 (0.1)    | 0.92 (0.3)    |

407-413

| Temp | WT            | I553G         | L546A         | L754A         | DM            |
|------|---------------|---------------|---------------|---------------|---------------|
| 10   | 0.047 (0.003) | 0.052 (0.003) | 0.042 (0.003) | 0.045 (0.003) | 0.044 (0.003) |
| 20   | 0.12 (0.02)   | 0.18 (0.03)   | 0.11 (0.02)   | 0.11 (0.02)   | 0.12 (0.01)   |
| 25   | 0.14 (0.02)   | 0.25 (0.05)   | 0.32 (0.08)   | 0.34 (0.007)  | 0.30 (0.05)   |
| 30   | 0.42 (0.2)    | 0.41 (0.1)    | 0.41 (0.08)   | 0.43 (0.1)    | 0.49 (0.15)   |
| 40   | 0.61 (0.3)    | 0.48 (0.2)    | 0.57 (0.2)    | 0.68 (0.3)    | 0.73 (0.3)    |

414-423

| Temp | WT          | I553G       | L546A       | L754A       | DM          |
|------|-------------|-------------|-------------|-------------|-------------|
| 10   | 0.25 (0.06) | 0.16 (0.03) | 0.28 (0.06) | 0.27 (0.07) | 0.23 (0.06) |
| 20   | 0.19 (0.03) | 0.22 (0.04) | 0.26 (0.05) | 0.65 (0.2)  | 0.30 (0.06) |
| 25   | 0.18 (0.03) | 0.33 (0.11) | 0.24 (0.04) | 0.22 (0.03) | 0.24 (0.05) |
| 30   | 0.35 (0.06) | 0.26 (0.11) | 0.30 (0.04) | 0.36 (0.08) | 0.30 (0.05) |
| 40   | 0.34 (0.2)  | 0.62 (0.15) | 0.19 (0.05) | 0.23 (0.07) | 0.33 (0.07) |

424-435

| Temp | WT   | I553G | L546A | L754A | DM   |
|------|------|-------|-------|-------|------|
| 10   | N.D. | N.D.  | N.D.  | N.D.  | N.D. |
| 20   | N.D. | N.D.  | N.D.  | N.D.  | N.D. |
| 25   | N.D. | N.D.  | N.D.  | N.D.  | N.D. |

|         |               |               |               |               |               |
|---------|---------------|---------------|---------------|---------------|---------------|
| 30      | N.D.          | N.D.          | N.D.          | N.D.          | N.D.          |
| 40      | N.D.          | N.D.          | N.D.          | N.D.          | N.D.          |
| 436-449 |               |               |               |               |               |
| Temp    | WT            | I553G         | L546A         | L754A         | DM            |
| 10      | N.D.          | N.D.          | N.D.          | N.D.          | N.D.          |
| 20      | N.D.          | N.D.          | N.D.          | N.D.          | N.D.          |
| 25      | N.D.          | N.D.          | N.D.          | N.D.          | N.D.          |
| 30      | N.D.          | N.D.          | N.D.          | N.D.          | N.D.          |
| 40      | N.D.          | N.D.          | N.D.          | N.D.          | N.D.          |
| 450-462 |               |               |               |               |               |
| Temp    | WT            | I553G         | L546A         | L754A         | DM            |
| 10      | N.D.          | N.D.          | N.D.          | N.D.          | N.D.          |
| 20      | N.D.          | N.D.          | N.D.          | N.D.          | N.D.          |
| 25      | N.D.          | N.D.          | N.D.          | N.D.          | N.D.          |
| 30      | N.D.          | N.D.          | N.D.          | N.D.          | N.D.          |
| 40      | N.D.          | N.D.          | N.D.          | N.D.          | N.D.          |
| 466-477 |               |               |               |               |               |
| Temp    | WT            | I553G         | L546A         | L754A         | DM            |
| 10      | N.D.          | N.D.          | N.D.          | N.D.          | N.D.          |
| 20      | N.D.          | N.D.          | N.D.          | N.D.          | N.D.          |
| 25      | N.D.          | N.D.          | N.D.          | N.D.          | N.D.          |
| 30      | N.D.          | N.D.          | N.D.          | N.D.          | N.D.          |
| 40      | N.D.          | N.D.          | N.D.          | N.D.          | N.D.          |
| 493-503 |               |               |               |               |               |
| Temp    | WT            | I553G         | L546A         | L754A         | DM            |
| 10      | N.D.          | N.D.          | N.D.          | N.D.          | N.D.          |
| 20      | N.D.          | N.D.          | N.D.          | N.D.          | N.D.          |
| 25      | N.D.          | N.D.          | N.D.          | N.D.          | N.D.          |
| 30      | N.D.          | N.D.          | N.D.          | N.D.          | N.D.          |
| 40      | N.D.          | N.D.          | N.D.          | N.D.          | N.D.          |
| 504-521 |               |               |               |               |               |
| Temp    | WT            | I553G         | L546A         | L754A         | DM            |
| 10      | N.D.          | N.D.          | N.D.          | N.D.          | N.D.          |
| 20      | N.D.          | N.D.          | N.D.          | N.D.          | N.D.          |
| 25      | N.D.          | N.D.          | N.D.          | N.D.          | N.D.          |
| 30      | N.D.          | N.D.          | N.D.          | N.D.          | N.D.          |
| 40      | N.D.          | N.D.          | N.D.          | N.D.          | N.D.          |
| 522-540 |               |               |               |               |               |
| Temp    | WT            | I553G         | L546A         | L754A         | DM            |
| 10      | 0.005 (0.002) | 0.007 (0.004) | 0.011 (0.005) | 0.005 (0.006) | 0.012 (0.004) |
| 20      | 0.009 (0.002) | 0.014 (0.002) | 0.011 (0.002) | 0.008 (0.004) | 0.018 (0.004) |
| 25      | 0.020 (0.003) | 0.016 (0.001) | 0.020 (0.002) | 0.017 (0.003) | 0.018 (0.004) |
| 30      | 0.028 (0.003) | 0.024 (0.004) | 0.023 (0.003) | 0.016 (0.004) | 0.026 (0.002) |
| 40      | 0.041 (0.005) | 0.041 (0.007) | 0.043 (0.004) | 0.047 (0.006) | 0.039 (0.005) |
| 541-554 |               |               |               |               |               |
| Temp    | WT            | I553G         | L546A         | L754A         | DM            |
| 10      | 0.001 (0.004) | 0.025 (0.003) | 0.003 (0.005) | 0.003 (0.005) | 0.003 (0.006) |

|         |               |               |               |               |               |
|---------|---------------|---------------|---------------|---------------|---------------|
| 20      | 0.004 (0.001) | 0.042 (0.004) | 0.008 (0.001) | 0.005 (0.002) | 0.011 (0.004) |
| 25      | 0.012 (0.001) | 0.073 (0.009) | 0.017 (0.001) | 0.012 (0.002) | 0.011 (0.001) |
| 30      | 0.019 (0.002) | 0.14 (0.03)   | 0.030 (0.002) | 0.018 (0.003) | 0.022 (0.002) |
| 40      | 0.047 (0.004) | 0.07 (0.02)   | 0.060 (0.008) | 0.053 (0.003) | 0.045 (0.006) |
| 555-565 |               |               |               |               |               |
| Temp    | WT            | I553G         | L546A         | L754A         | DM            |
| 10      | 0.001 (0.002) | 0.007 (0.002) | 0.003 (0.004) | 0.002 (0.004) | 0.001 (0.001) |
| 20      | 0.003 (0.001) | 0.011 (0.001) | 0.004 (0.001) | 0.004 (0.002) | 0.011 (0.003) |
| 25      | 0.009 (0.001) | 0.020 (0.001) | 0.008 (0.001) | 0.009 (0.001) | 0.009 (0.001) |
| 30      | 0.015 (0.001) | 0.031 (0.003) | 0.011 (0.001) | 0.012 (0.002) | 0.015 (0.002) |
| 40      | 0.019 (0.003) | 0.093 (0.008) | 0.016 (0.002) | 0.017 (0.002) | 0.015 (0.002) |
| 566-576 |               |               |               |               |               |
| Temp    | WT            | I553G         | L546A         | L754A         | DM            |
| 10      | 0.004 (0.001) | 0.012 (0.002) | 0.008 (0.002) | 0.007 (0.001) | 0.009 (0.002) |
| 20      | 0.016 (0.001) | 0.019 (0.002) | 0.016 (0.001) | 0.015 (0.002) | 0.019 (0.002) |
| 25      | 0.024 (0.002) | 0.027 (0.003) | 0.022 (0.002) | 0.024 (0.002) | 0.025 (0.002) |
| 30      | 0.043 (0.004) | 0.044 (0.006) | 0.036 (0.004) | 0.034 (0.005) | 0.033 (0.004) |
| 40      | 0.086 (0.01)  | 0.062 (0.02)  | 0.09 (0.02)   | 0.067 (0.01)  | 0.080 (0.017) |
| 586-603 |               |               |               |               |               |
| Temp    | WT            | I553G         | L546A         | L754A         | DM            |
| 10      | 0.089 (0.01)  | 0.09 (0.01)   | 0.056 (0.01)  | 0.064 (0.01)  | 0.055 (0.01)  |
| 20      | 0.16 (0.03)   | 0.30 (0.04)   | 0.17 (0.03)   | 0.13 (0.02)   | 0.14 (0.03)   |
| 25      | 0.24 (0.04)   | 0.34 (0.07)   | 0.29 (0.07)   | 0.37 (0.08)   | 0.30 (0.06)   |
| 30      | 0.41 (0.2)    | 0.33 (0.1)    | 0.41 (0.09)   | 0.37 (0.1)    | 0.41 (0.16)   |
| 40      | 0.64 (0.2)    | 0.48 (0.2)    | 0.33 (0.1)    | 0.031 (0.02)  | 0.74 (0.3)    |
| 604-617 |               |               |               |               |               |
| Temp    | WT            | I553G         | L546A         | L754A         | DM            |
| 10      | 0.021 (0.009) | 0.015 (0.006) | 0.014 (0.006) | 0.013 (0.006) | N.C.          |
| 20      | 0.022 (0.003) | 0.036 (0.01)  | 0.025 (0.005) | 0.022 (0.007) | N.C.          |
| 25      | 0.051 (0.01)  | 0.037 (0.005) | 0.047 (0.009) | 0.049 (0.01)  | N.C.          |
| 30      | 0.045 (0.02)  | 0.099 (0.05)  | 0.22 (0.1)    | 0.069 (0.02)  | N.C.          |
| 40      | 0.068 (0.02)  | 0.23 (0.1)    | 0.096 (0.04)  | 0.043 (0.01)  | N.C.          |
| 619-632 |               |               |               |               |               |
| Temp    | WT            | I553G         | L546A         | L754A         | DM            |
| 10      | N.D.          | N.C.          | N.C.          | N.C.          | N.D.          |
| 20      | N.D.          | N.C.          | N.C.          | N.C.          | N.D.          |
| 25      | N.D.          | N.C.          | N.C.          | N.C.          | N.D.          |
| 30      | N.D.          | N.C.          | N.C.          | N.C.          | N.D.          |
| 40      | N.D.          | N.C.          | N.C.          | N.C.          | N.D.          |
| 633-648 |               |               |               |               |               |
| Temp    | WT            | I553G         | L546A         | L754A         | DM            |
| 10      | 0.012 (0.003) | 0.011 (0.003) | 0.009 (0.003) | 0.007 (0.003) | 0.010 (0.003) |
| 20      | 0.013 (0.003) | 0.011 (0.002) | 0.013 (0.001) | 0.009 (0.003) | 0.022 (0.003) |
| 25      | 0.015 (0.002) | 0.021 (0.004) | 0.016 (0.003) | 0.016 (0.003) | 0.019 (0.003) |
| 30      | 0.023 (0.003) | 0.026 (0.01)  | 0.021 (0.003) | 0.020 (0.003) | 0.020 (0.003) |

|         |               |               |               |               |               |
|---------|---------------|---------------|---------------|---------------|---------------|
| 40      | 0.035 (0.006) | 0.036 (0.004) | 0.037 (0.007) | 0.026 (0.004) | 0.032 (0.005) |
| 649-669 |               |               |               |               |               |
| Temp    | WT            | I553G         | L546A         | L754A         | DM            |
| 10      | 0.046 (0.004) | 0.047 (0.005) | 0.033 (0.004) | 0.033 (0.004) | N.C.          |
| 20      | 0.093 (0.01)  | 0.15 (0.03)   | 0.077 (0.01)  | 0.080 (0.009) | N.C.          |
| 25      | 0.15 (0.02)   | 0.17 (0.04)   | 0.19 (0.05)   | 0.21 (0.04)   | N.C.          |
| 30      | 0.24 (0.06)   | 0.25 (0.05)   | 0.29 (0.05)   | 0.021 (0.04)  | N.C.          |
| 40      | 0.55 (0.1)    | 0.45 (0.1)    | 0.59 (0.06)   | 0.48 (0.1)    | N.C.          |
| 690-703 |               |               |               |               |               |
| Temp    | WT            | I553G         | L546A         | L754A         | DM            |
| 10      | N.D.          | N.D.          | N.D.          | N.D.          | N.D.          |
| 20      | N.D.          | N.D.          | N.D.          | N.D.          | N.D.          |
| 25      | N.D.          | N.D.          | N.D.          | N.D.          | N.D.          |
| 30      | N.D.          | N.D.          | N.D.          | N.D.          | N.D.          |
| 40      | N.D.          | N.D.          | N.D.          | N.D.          | N.D.          |
| 704-726 |               |               |               |               |               |
| Temp    | WT            | I553G         | L546A         | L754A         | DM            |
| 10      | 0.053 (0.006) | 0.043 (0.006) | 0.037 (0.06)  | N.C.          | 0.032 (0.005) |
| 20      | 0.061 (0.02)  | 0.078 (0.03)  | 0.044 (0.009) | N.C.          | 0.063 (0.01)  |
| 25      | 0.069 (0.02)  | 0.056 (0.01)  | 0.032 (0.01)  | N.C.          | 0.073 (0.02)  |
| 30      | 0.043 (0.01)  | 0.049 (0.02)  | 0.030 (0.01)  | N.C.          | 0.037 (0.01)  |
| 40      | 0.069 (0.02)  | 0.053 (0.01)  | 0.10 (0.03)   | N.C.          | 0.055 (0.01)  |
| 727-737 |               |               |               |               |               |
| Temp    | WT            | I553G         | L546A         | L754A         | DM            |
| 10      | 0.020 (0.002) | 0.022 (0.002) | 0.015 (0.002) | 0.013 (0.001) | 0.017 (0.001) |
| 20      | 0.049 (0.005) | 0.059 (0.007) | 0.039 (0.003) | 0.039 (0.003) | 0.050 (0.003) |
| 25      | 0.091 (0.01)  | 0.087 (0.01)  | 0.063 (0.01)  | 0.069 (0.01)  | 0.088 (0.01)  |
| 30      | 0.15 (0.04)   | 0.13 (0.04)   | 0.10 (0.02)   | 0.097 (0.02)  | 0.11 (0.02)   |
| 40      | 0.25 (0.01)   | 0.21 (0.2)    | 0.097 (0.04)  | 0.23 (0.09)   | 0.045 (0.009) |
| 738-745 |               |               |               |               |               |
| Temp    | WT            | I553G         | L546A         | L754A         | DM            |
| 10      | 0.030 (0.004) | 0.051 (0.004) | 0.034 (0.005) | 0.028 (0.003) | 0.030 (0.003) |
| 20      | 0.073 (0.008) | 0.20 (0.03)   | 0.13 (0.01)   | 0.088 (0.01)  | 0.11 (0.01)   |
| 25      | 0.15 (0.02)   | 0.25 (0.04)   | 0.27 (0.04)   | 0.23 (0.04)   | 0.28 (0.04)   |
| 30      | 0.30 (0.09)   | 0.29 (0.09)   | 0.51 (0.1)    | 0.29 (0.06)   | 0.39 (0.11)   |
| 40      | 0.85 (0.2)    | 0.017 (0.006) | 0.80 (0.4)    | 0.67 (0.2)    | 0.96 (0.4)    |
| 751-761 |               |               |               |               |               |
| Temp    | WT            | I553G         | L546A         | L754A         | DM            |
| 10      | 0.055 (0.02)  | 0.37 (0.1)    | 0.10 (0.03)   | 0.023 (0.005) | 0.040 (0.009) |
| 20      | 0.073 (0.01)  | 0.70 (0.2)    | 0.26 (0.07)   | 0.041 (0.01)  | 0.14 (0.03)   |
| 25      | 0.11 (0.02)   | 0.48 (0.2)    | 0.85 (0.5)    | 0.23 (0.09)   | 0.46 (0.16)   |
| 30      | 0.65 (0.74)   | 0.25 (0.3)    | 0.007 (0.007) | 0.12 (0.03)   | 0.63 (0.4)    |
| 40      | 0.099 (0.05)  | 0.007 (0.007) | 0.012 (0.006) | 0.036 (0.02)  | 0.018 (0.09)  |
| 762-781 |               |               |               |               |               |
| Temp    | WT            | I553G         | L546A         | L754A         | DM            |



|         |               |               |               |               |               |
|---------|---------------|---------------|---------------|---------------|---------------|
| 10      | 0.025 (0.002) | 0.027 (0.002) | 0.019 (0.002) | 0.018 (0.002) | 0.019 (0.002) |
| 20      | 0.056 (0.006) | 0.076 (0.01)  | 0.046 (0.005) | 0.045 (0.004) | 0.053 (0.006) |
| 25      | 0.11 (0.02)   | 0.097 (0.01)  | 0.064 (0.01)  | 0.10 (0.02)   | 0.10 (0.02)   |
| 30      | 0.12 (0.02)   | 0.15 (0.03)   | 0.15 (0.03)   | 0.10 (0.02)   | 0.12 (0.02)   |
| 40      | 0.34 (0.06)   | 0.40 (0.09)   | 0.37 (0.05)   | 0.38 (0.1)    | 0.25 (0.1)    |
| 782-796 |               |               |               |               |               |
| Temp    | WT            | I553G         | L546A         | L754A         | DM            |
| 10      | 0.012 (0.001) | 0.017 (0.003) | 0.009 (0.002) | 0.010 (0.002) | 0.017 (0.004) |
| 20      | 0.034 (0.002) | 0.047 (0.004) | 0.031 (0.004) | 0.030 (0.004) | 0.033 (0.003) |
| 25      | 0.044 (0.008) | 0.046 (0.007) | 0.046 (0.003) | 0.044 (0.004) | 0.048 (0.006) |
| 30      | 0.077 (0.02)  | 0.059 (0.009) | 0.049 (0.01)  | 0.071 (0.02)  | 0.049 (0.07)  |
| 40      | 0.046 (0.01)  | 0.030 (0.008) | 0.043 (0.01)  | 0.039 (0.01)  | 0.038 (0.01)  |
| 797-820 |               |               |               |               |               |
| Temp    | WT            | I553G         | L546A         | L754A         | DM            |
| 10      | 0.24 (0.08)   | 0.28 (0.1)    | 0.29 (0.1)    | 0.13 (0.05)   | 0.27 (0.1)    |
| 20      | 0.027 (0.009) | 0.021 (0.008) | 0.024 (0.004) | 0.029 (0.01)  | 0.38 (0.19)   |
| 25      | 0.021 (0.006) | 0.026 (0.008) | 0.022 (0.02)  | 0.020 (0.007) | 0.032 (0.011) |
| 30      | 0.024 (0.005) | 0.020 (0.008) | 0.022 (0.005) | 0.018 (0.004) | 0.018 (0.004) |
| 40      | 0.030 (0.007) | 0.027 (0.003) | 0.029 (0.005) | 0.018 (0.004) | 0.025 (0.005) |
| 821-836 |               |               |               |               |               |
| Temp    | WT            | I553G         | L546A         | L754A         | DM            |
| 10      | 0.024 (0.004) | 0.029 (0.005) | 0.031 (0.007) | 0.046 (0.01)  | 0.037 (0.009) |
| 20      | 0.020 (0.004) | 0.013 (0.004) | 0.025 (0.005) | 0.026 (0.008) | 0.034 (0.008) |
| 25      | 0.014 (0.004) | 0.019 (0.004) | 0.016 (0.004) | 0.019 (0.006) | 0.026 (0.006) |
| 30      | 0.020 (0.003) | 0.020 (0.006) | 0.018 (0.003) | 0.017 (0.003) | 0.017 (0.003) |
| 40      | 0.036 (0.005) | 0.042 (0.004) | 0.037 (0.008) | 0.026 (0.013) | 0.024 (0.003) |

N.D. = not determined

N.C. = no coverage

**Table S3.** Apparent activation energies for HDX (kcal/mol)

|                | WT                      | I553G            | L546A             | L754A            | DM                       |
|----------------|-------------------------|------------------|-------------------|------------------|--------------------------|
| 144-160        | 10.9 (1.8)              | 12.4 (1.0)       | 14.2 (2.3)        | 8.1 (2.9)        | 13.2 (3)                 |
| 167-185        | -7.6 (4.5)              | -3.5 (3.2)       | -3.6 (5.2)        | -7.4 (7.9)       | -3.2 (5.8)               |
| 186-206        | 3.1 (2.3)               | 8.8 (3.5)        | 5.0 (5.7)         | 6.4 (3.3)        | 13.7 (2.2)               |
| 212-238*       | 15.1 (3.2)              | N.C.             | 15.3 (2.5)        | 18.0 (3.2)       | N.C.                     |
| 239-256        | N.D.                    | N.D.             | N.D.              | N.D.             | N.D.                     |
| 257-273        | N.D.                    | N.D.             | N.D.              | N.D.             | N.D.                     |
| 274-283        | N.D.                    | N.D.             | N.D.              | N.D.             | N.D.                     |
| 284-296        | 16.2 (0.8)              | 15.8 (7.9)       | N.C.              | N.C.             | 20.2 (3.4)               |
| 284-299        | 11.7 (2.2)              | 3.9 (1.2)        | 14.3 (2.4)        | 14.9 (2.3)       | 12.8 (2.1)               |
| 297-305        | 14.0 (4.2)              | 12.5 (1.2)       | 12.1 (1.9)        | 14.0 (3.3)       | 17.5 (1.5)               |
| 306-316        | 8.9 (4.4)               | 7.1 (0.6)        | 9.0 (2.3)         | 11.4 (3.4)       | 12.7 (2.1)               |
| 316-334        | 1.2 (3.1)<br>6.7 (3.1)* | 1.5 (1.6)        | 14.2 (3.3)        | 3.1 (0.3)        | 7.7 (4.1)<br>12.9 (5.3)* |
| 316-338        | 7.6 (1.3)               | 6.9 (2.0)        | 13.1 (2.6)        | 6.7 (0.6)        | 9.6 (2.3)                |
| <b>317-334</b> | <b>4.8 (0.8)</b>        | <b>0.7 (1.2)</b> | <b>13.9 (2.5)</b> | <b>5.2 (0.6)</b> | <b>13.0 (2.3)</b>        |
| 347-355        | N.D.                    | N.D.             | N.D.              | N.D.             | N.C.                     |
| 362-388        | 16.6 (3.3)              | N.C.             | 18.5 (1.9)        | 17.3 (3.2)       | 20.7 (1.8)               |
| 407-413        | 15.8 (2.2)              | 13.3 (2.3)       | 16.2 (2.8)        | 16.8 (2.6)       | 18.7 (1.6)               |
| 414-423        | 2.7 (2.3)               | 7.3 (1.7)        | -1.8 (1.3)        | -1.7 (3.9)       | 2.0 (0.9)                |
| 424-435        | N.D.                    | N.D.             | N.D.              | N.D.             | N.D.                     |
| 436-449        | N.D.                    | N.D.             | N.D.              | N.D.             | N.D.                     |
| 450-462        | N.D.                    | N.D.             | N.D.              | N.D.             | N.D.                     |
| 466-477        | N.D.                    | N.D.             | N.D.              | N.D.             | N.D.                     |
| 493-503        | N.D.                    | N.D.             | N.D.              | N.D.             | N.D.                     |
| 504-521        | N.D.                    | N.D.             | N.D.              | N.D.             | N.D.                     |
| 522-540        | 13.2 (1.7)              | 10.3 (0.5)       | 8.4 (1.8)         | 13 (1.9)         | 6.8 (0.8)                |
| 541-554        | 23.1 (1.9)              | 14.2 (2.6)       | 18.2 (1.2)        | 17.4 (1.9)       | 15.6 (1.6)               |
| 555-565        | 18.5 (3.2)              | 15.4 (1.9)       | 10.6 (1.6)        | 13.3 (1.8)       | 15.0 (5.6)               |
| 566-576        | 18.0 (1.3)              | 10.2 (0.9)       | 14.1 (1.0)        | 13.4 (0.3)       | 12.5 (0.8)               |
| 586-603        | 12.1 (0.9)              | 9.1 (2.4)        | 5.6 (4.1)         | 10.3 (3.8)       | N.C.                     |
| 604-617        | 7.5 (2.6)               | 16.1 (2.1)       | 14.1 (5.6)        | 8.5 (3.6)        | N.C.                     |
| 619-632        | N.D.                    | N.C.             | N.C.              | N.C.             | N.D.                     |
| 633-648        | 6.6 (1.5)               | 7.7 (1.7)        | 8.3 (0.7)         | 8.3 (1.3)        | 6.0 (1.6)                |
| 649-669        | 14.8 (0.7)              | 12.9 (1.3)       | 17.6 (1.5)        | 15.9 (1.9)       | N.C.                     |
| 690-703        | N.D.                    | N.D.             | N.D.              | N.D.             | N.D.                     |
| 704-726        | 0.8 (1.8)               | 0.4 (2.0)        | 4.4 (3.6)         | N.C.             | 1.9 (3.0)                |
| 727-737*       | 17.2 (1.0)              | 15.1 (0.5)       | 16.1 (0.2)        | 17.5 (0.6)       | 16.7 (1.3)               |
| 738-745        | 20.1 (1.2)              | 15.2 (1.6)       | 19.3 (1.1)        | 18.9 (1.7)       | 20.6 (1.5)               |
| 751-761**      | 7.3 (2.3)               | 4.1 (5.7)        | 22.7 (6.1)        | 23.2 (12.2)      | 26.1 (5.4)               |
| 762-781        | 15.1 (1.2)              | 15.5 (0.4)       | 17.7 (1.4)        | 17.5 (1.8)       | 15.0 (1.2)               |
| 782-796*       | 15.4 (1.1)              | 10.4 (2.5)       | 15.2 (2.8)        | 16.6 (0.6)       | 9.5 (1.4)                |
| 797-820*       | 1.6 (2.0)               | 1.2 (3.8)        | -5.1 (16.2)       | 3.3 (2.5)        | -1.6 (6.8)               |
| 821-836        | 2.0 (2.9)               | 2.5 (3.8)        | 0.2 (3.2)         | -3.9 (2.7)       | -3.7 (1.9)               |

\*Only fit 4 of 5 data points. \*\* Only fit 3 of 5 data points.

**Table S4:** Data collection and refinement statistics

|                                          | L546A                        | L754A                        | DM                           |
|------------------------------------------|------------------------------|------------------------------|------------------------------|
| PDB ID:                                  | 5TQN                         | 5TR0                         | 5TQO                         |
| Wavelength (Å)                           | 0.826556                     | 0.826545                     | 0.826561                     |
| Temperature (K)                          | 293                          | 293                          | 300                          |
| Space group                              | P1 2 <sub>1</sub> 1          | P1 2 <sub>1</sub> 1          | P1 2 <sub>1</sub> 1          |
| Cell parameters                          |                              |                              |                              |
| a b c (Å)                                | 91.52 92.66                  | 91.45 92.65 100.72           | 91.61 92.81 101.27           |
| α β γ (°)                                | 100.75 90.00<br>93.47 90.00  | 90.00 93.39 90.00            | 90 94.11 90                  |
| Copies per a.s.u                         | 2                            | 2                            | 2                            |
| Resolution (Å)                           | 45.68-1.80 (1.83-<br>1.80)   | 45.65-1.85<br>(1.88-1.85)    | 68.34-1.70<br>(1.79-1.70)    |
| Rmerge                                   | 0.068 (0.832)                | 0.099 (0.812)                | 0.096 (0.687)                |
| I/σI                                     | 11.1 (1.5)                   | 13.3 (1.7)                   | 7.3 (1.6)                    |
| Completeness (%)                         | 99.8 (99.9)                  | 99.7 (99.7)                  | 99.13 (98.66)                |
| Redundancy                               | 3.5 (3.6)                    | 2.9 (2.9)                    | 3.7 (3.7)                    |
| <b>Refinement</b>                        |                              |                              |                              |
| Resolution (Å)                           | 45.68-1.80 (1.82-<br>1.80)   | 45.65-1.85 (1.87-<br>1.85)   | 68.341-1.7 (1.742-<br>1.7)   |
| Number of reflections                    |                              |                              |                              |
| Total                                    | 154938 (5099)                | 142544 (4605)                | 183987 (13034)               |
| Test                                     | 7863 (253)                   | 7248 (249)                   | 2020 (129)                   |
| R <sub>work</sub> /R <sub>free</sub> (%) | 13.69/16.21<br>(29.44/35.19) | 14.30/17.20<br>(26.79/33.46) | 14.20/16.49<br>(25.71/29.03) |
| Number of non H atoms                    | 21360                        | 21587                        | 21492                        |
| Protein                                  | 20634                        | 20886                        | 20591                        |
| Ligand                                   | 2                            | 2                            | 2                            |
| Solvent                                  | 724                          | 699                          | 899                          |
| Wilson B-factor                          | 22.70                        | 22.22                        | 17.92                        |
| Average B-factor                         | 27.07                        | 27.26                        | 22.89                        |
| Protein                                  | 26.90                        | 27.11                        | 22.50                        |
| Ligand                                   | 27.12                        | 30.66                        | 14.7                         |
| Solvent                                  | 31.99                        | 31.57                        | 31.83                        |
| <b>Rmsd</b>                              |                              |                              |                              |
| Rmsd bond lengths                        | 0.011                        | 0.011                        | 0.006                        |
| Rmsd bond angles                         | 1.021                        | 1.045                        | 0.769                        |
| <b>Ramachandran plot</b>                 |                              |                              |                              |
| Favored (%)                              | 95.69                        | 95.84                        | 96.01                        |
| Allowed (%)                              | 4.27                         | 4.16                         | 3.75                         |
| Outliers (%)                             | 0.04                         | 0                            | 0.24                         |

Statistics for the highest-resolution shell are shown in parentheses.

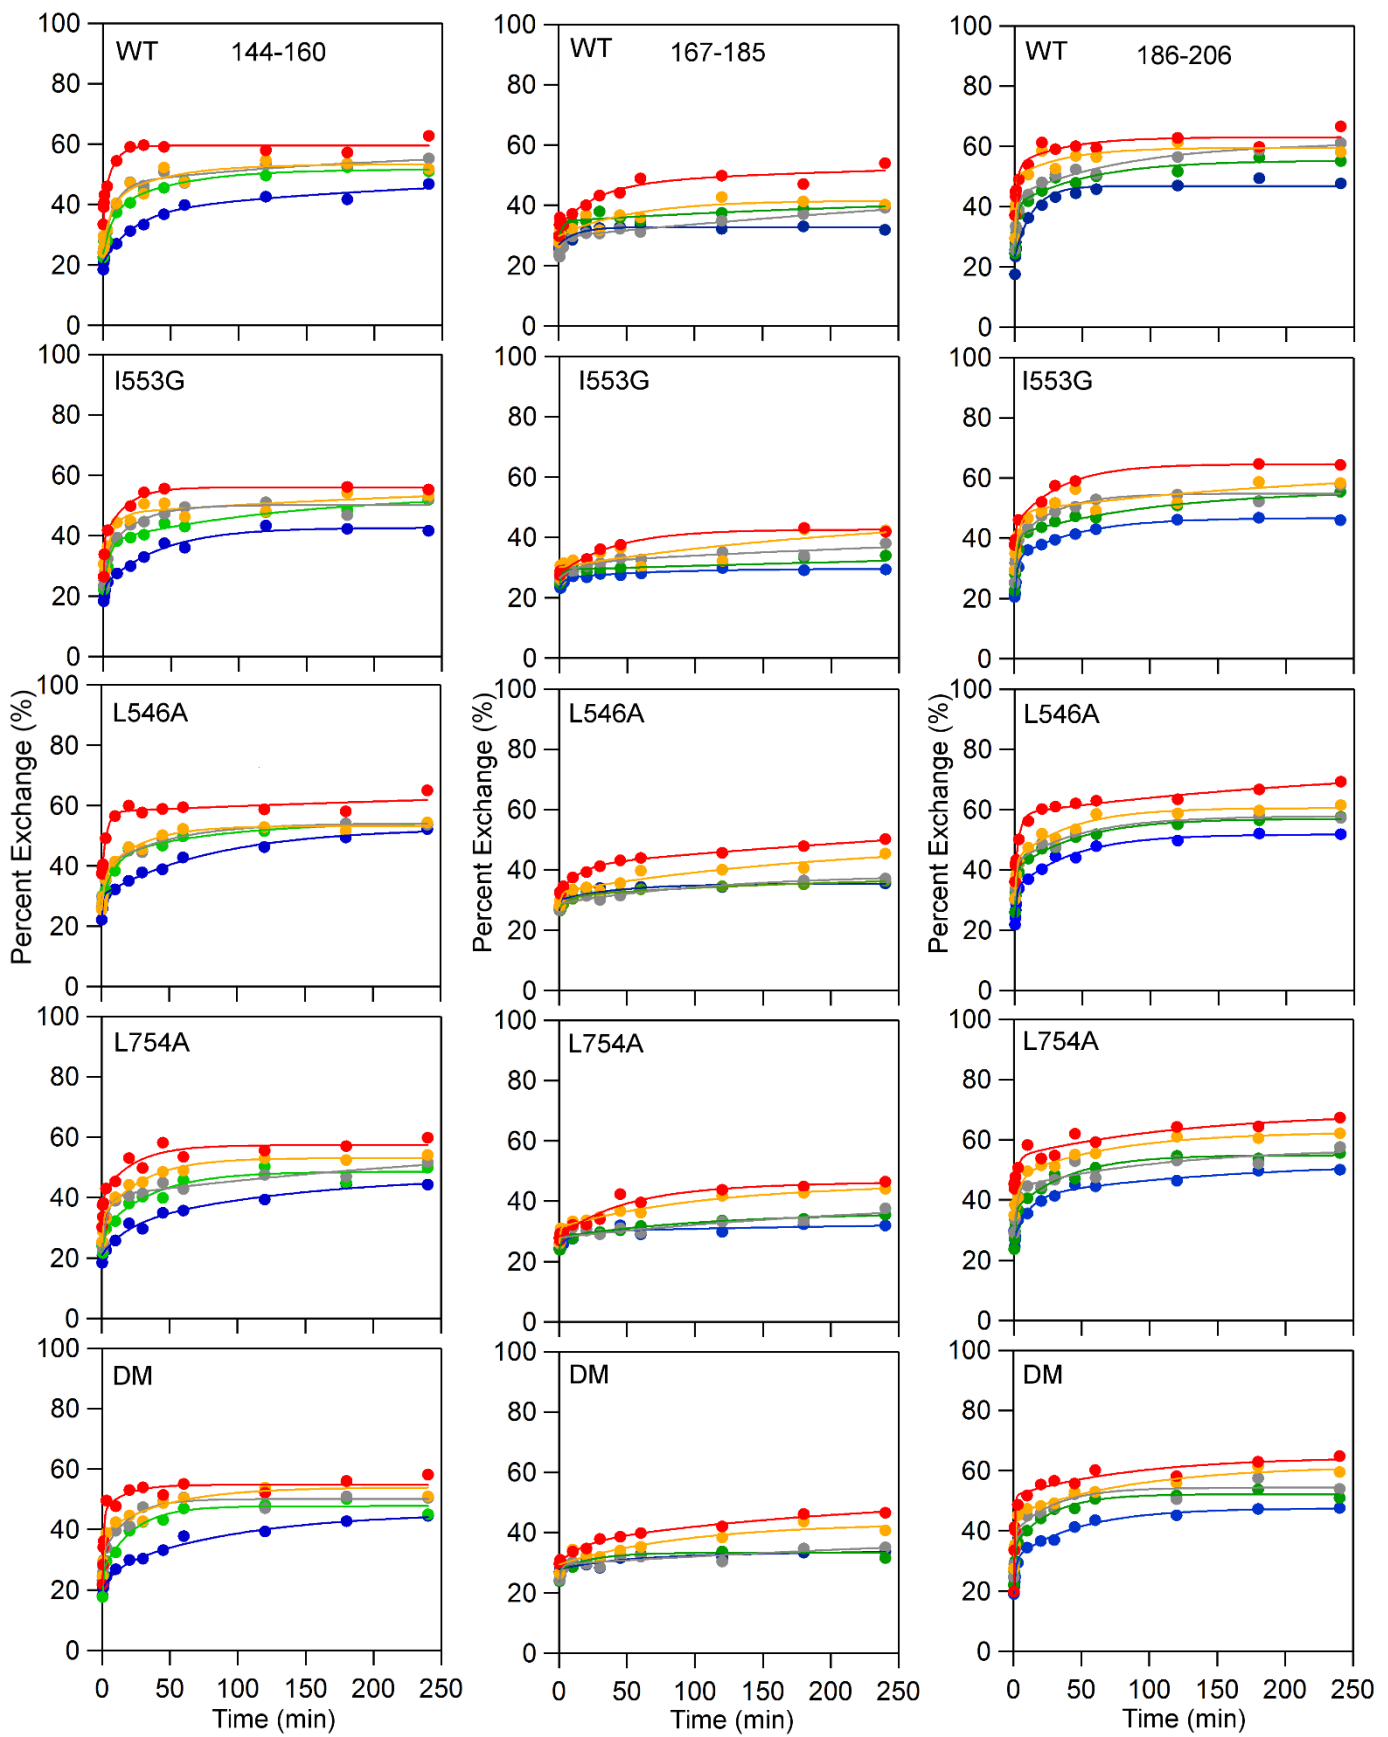

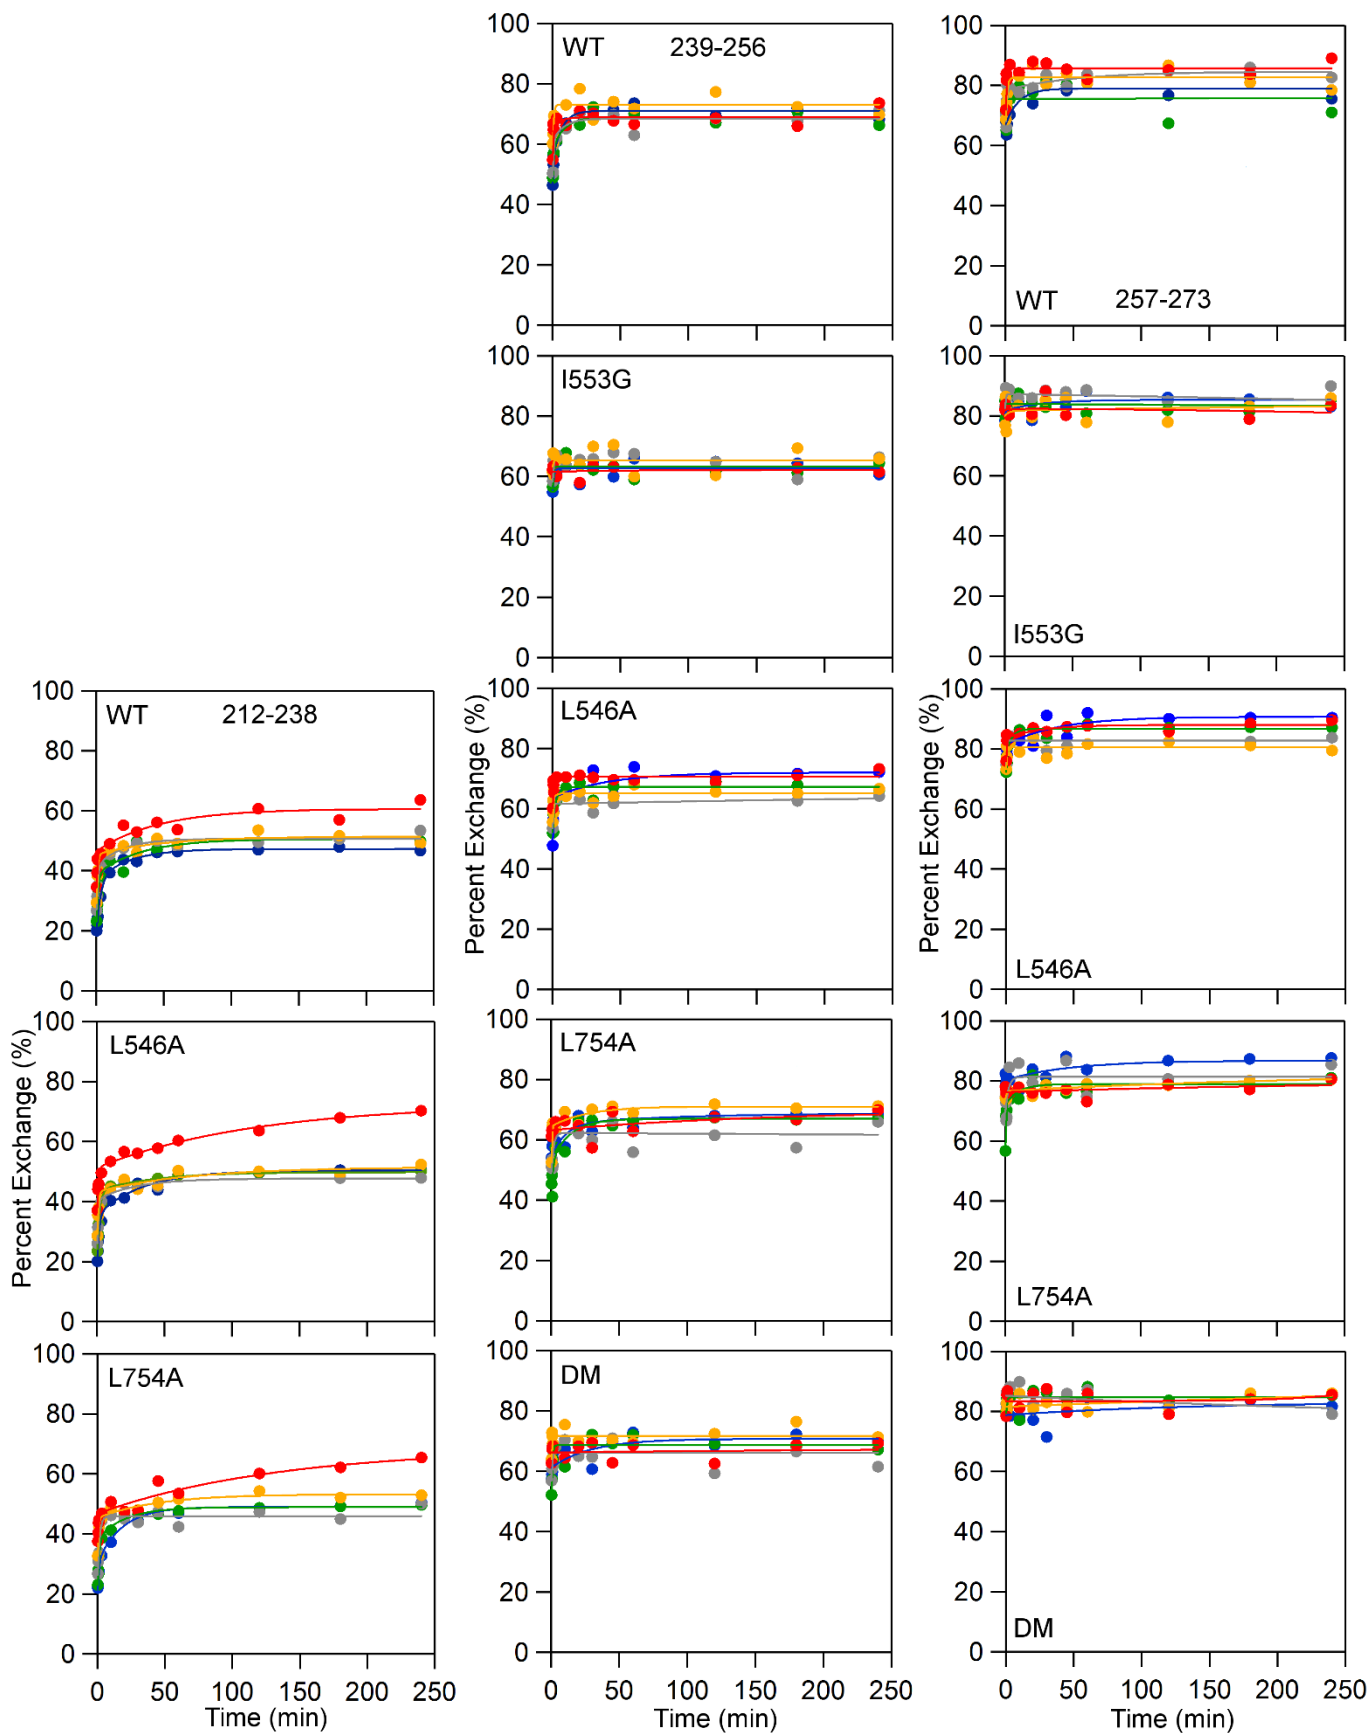

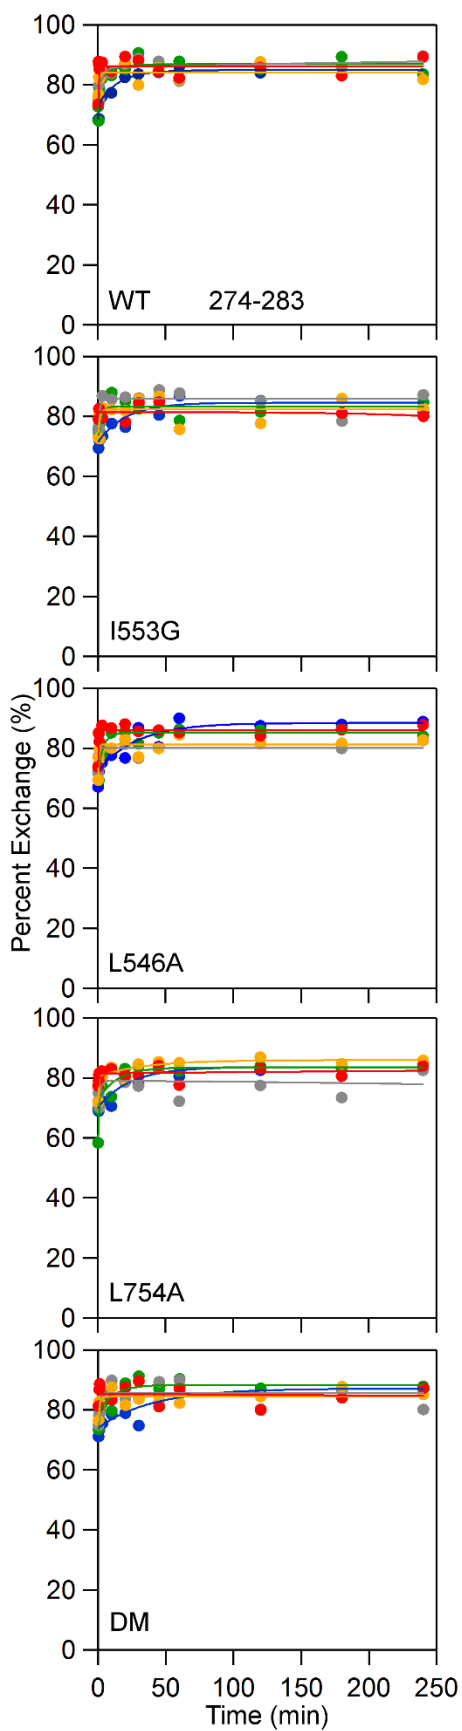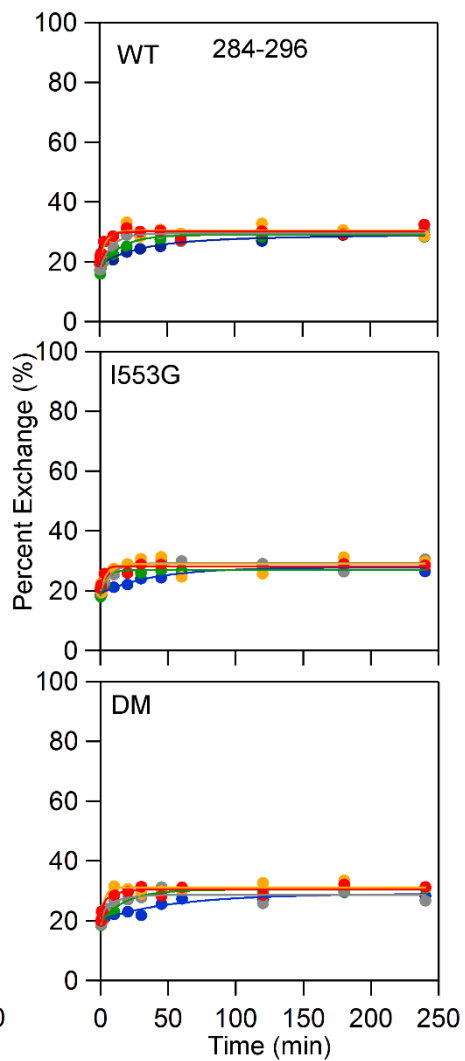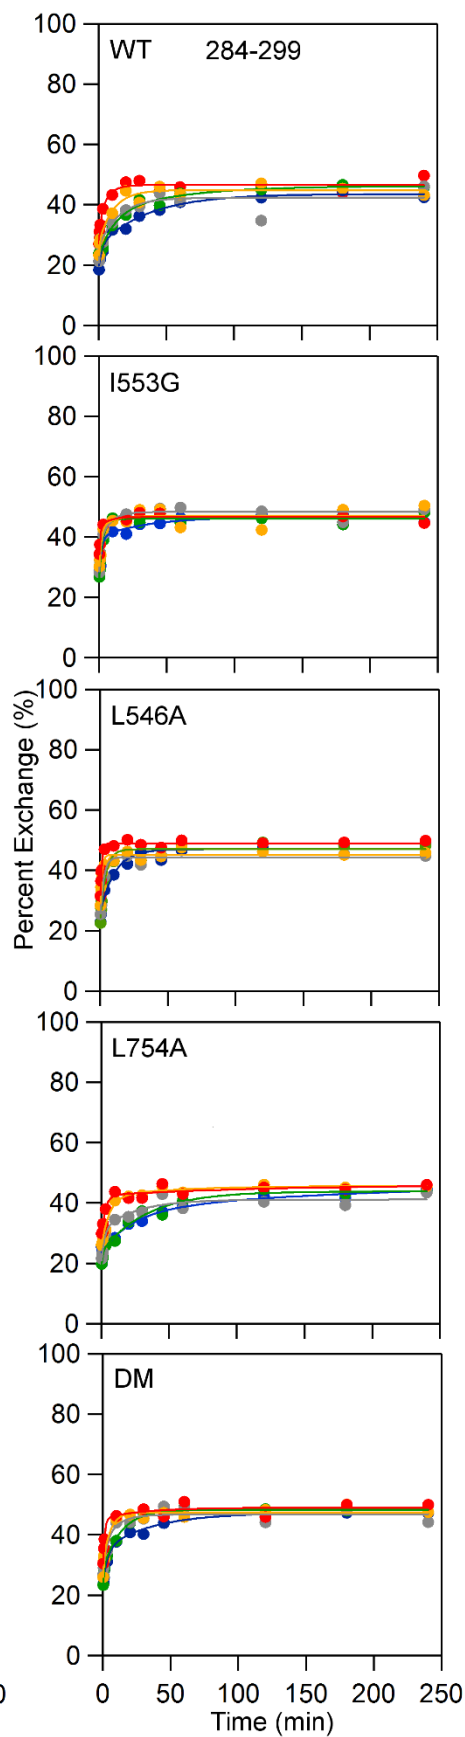

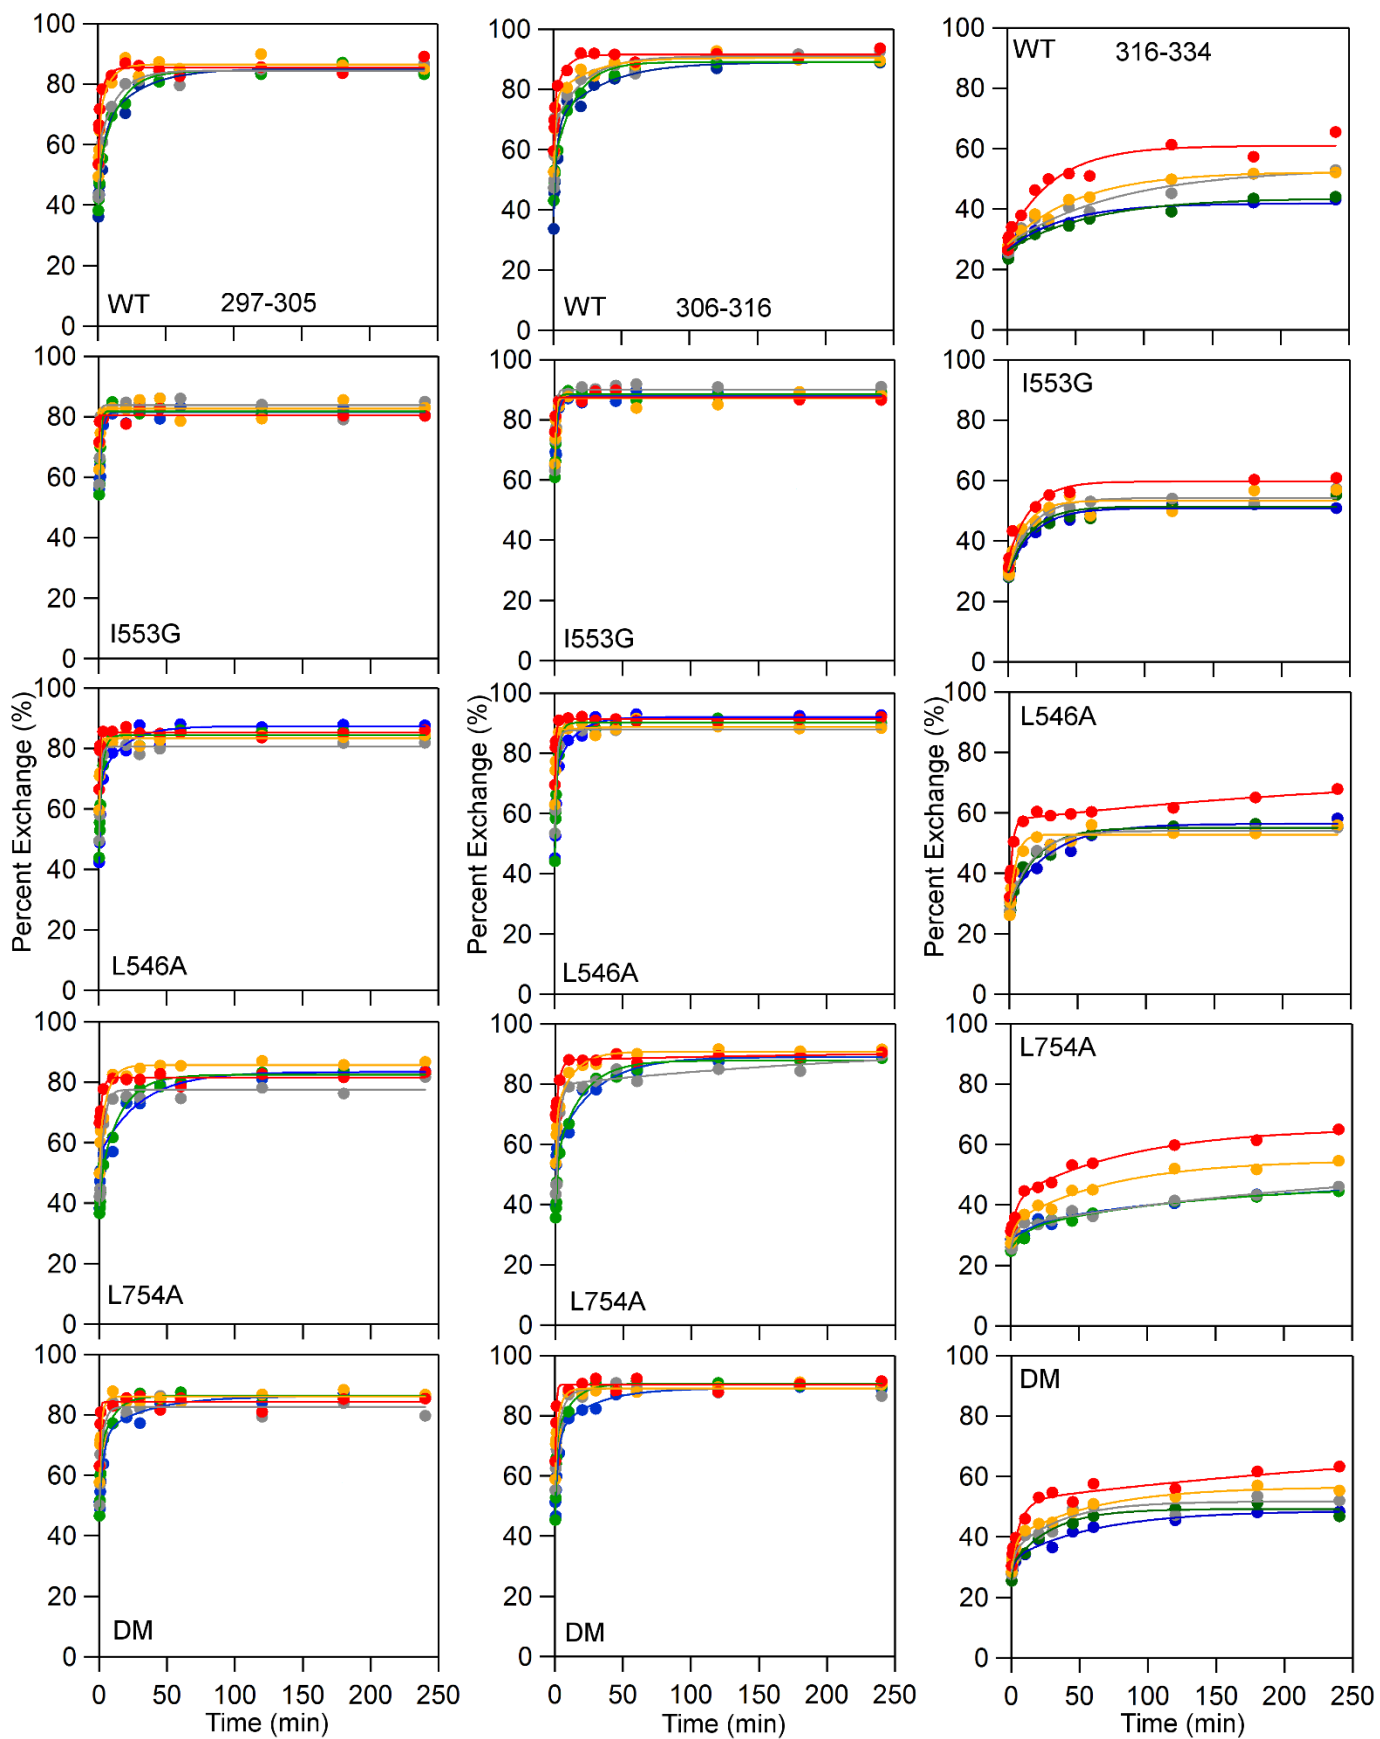

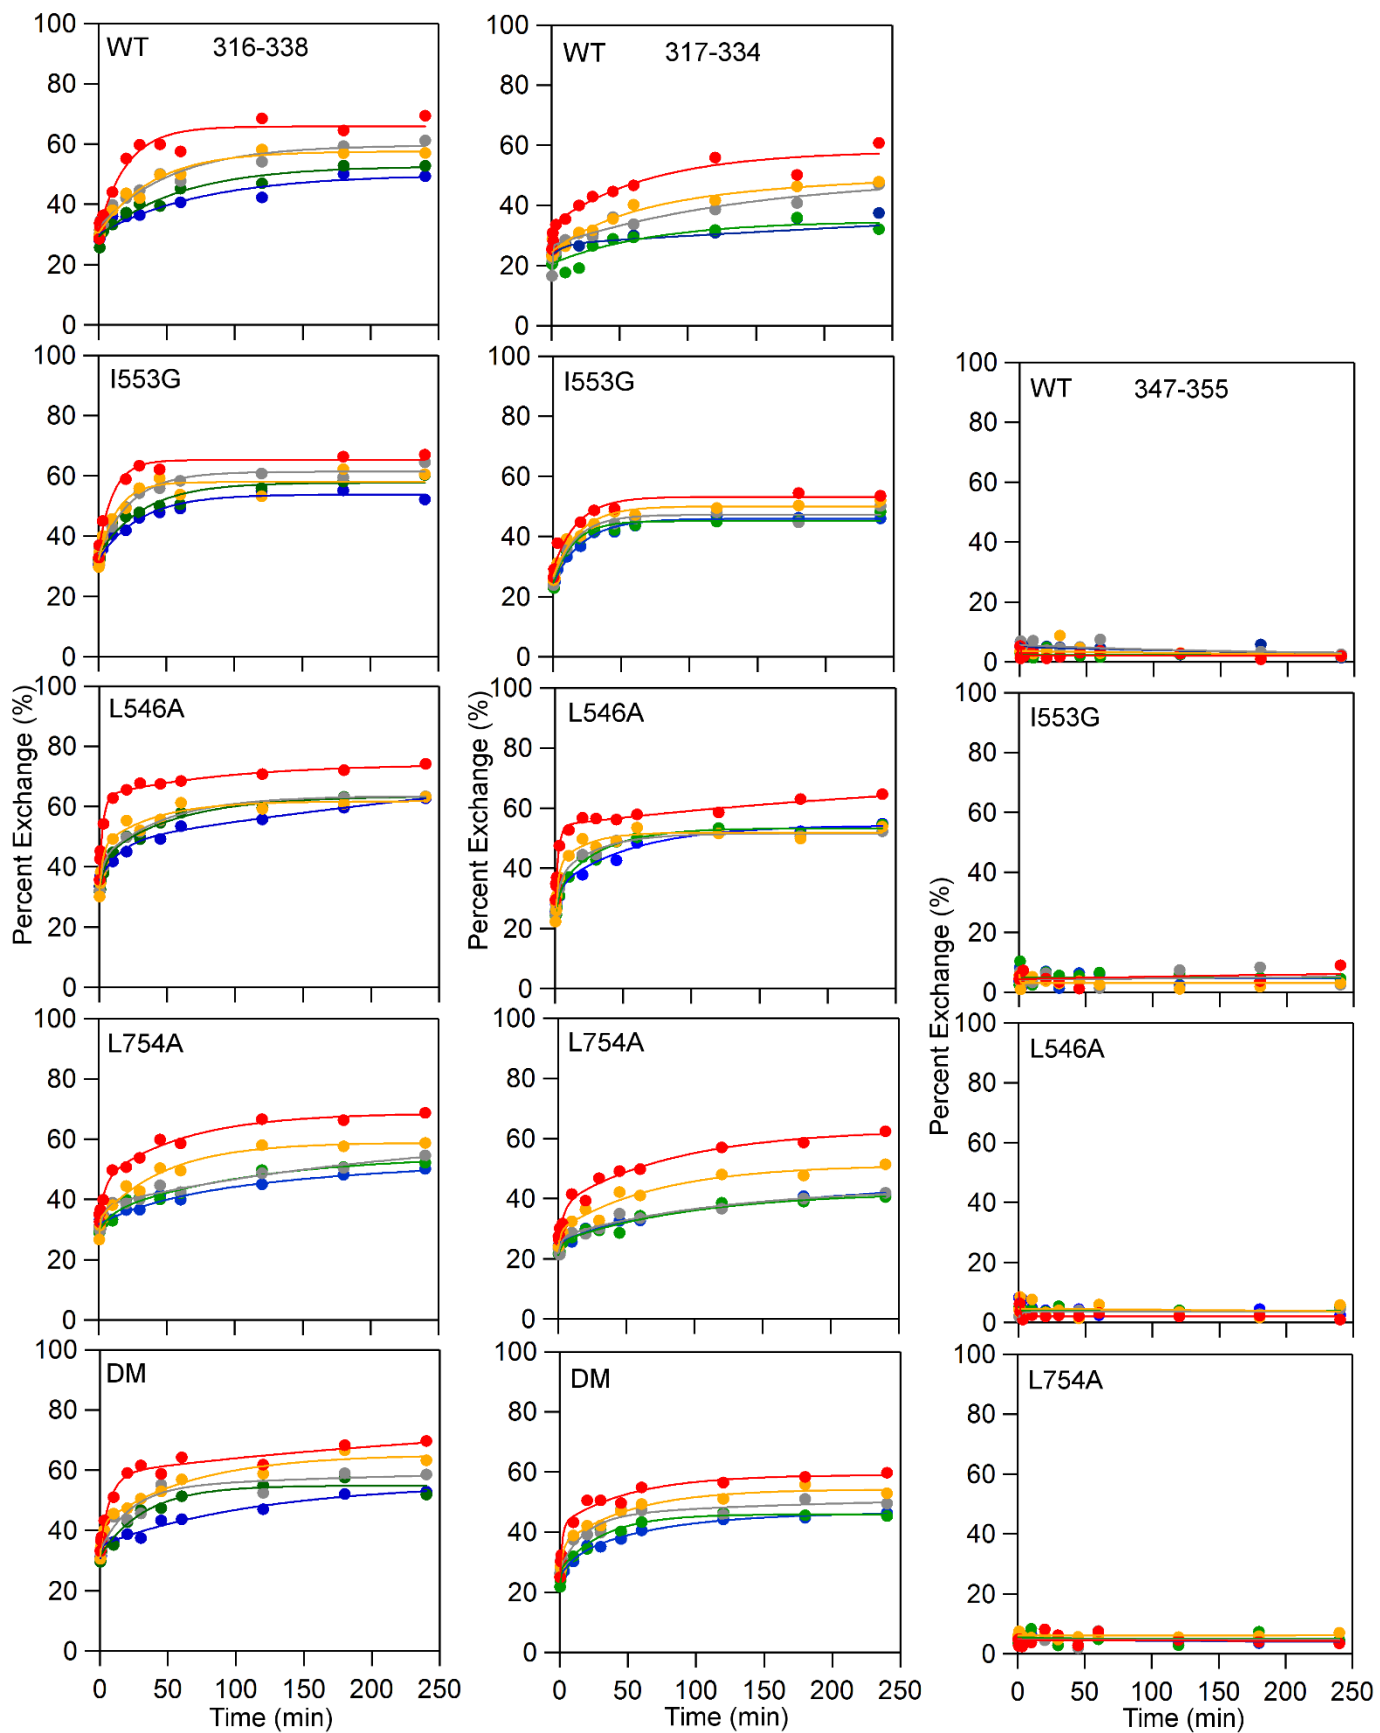



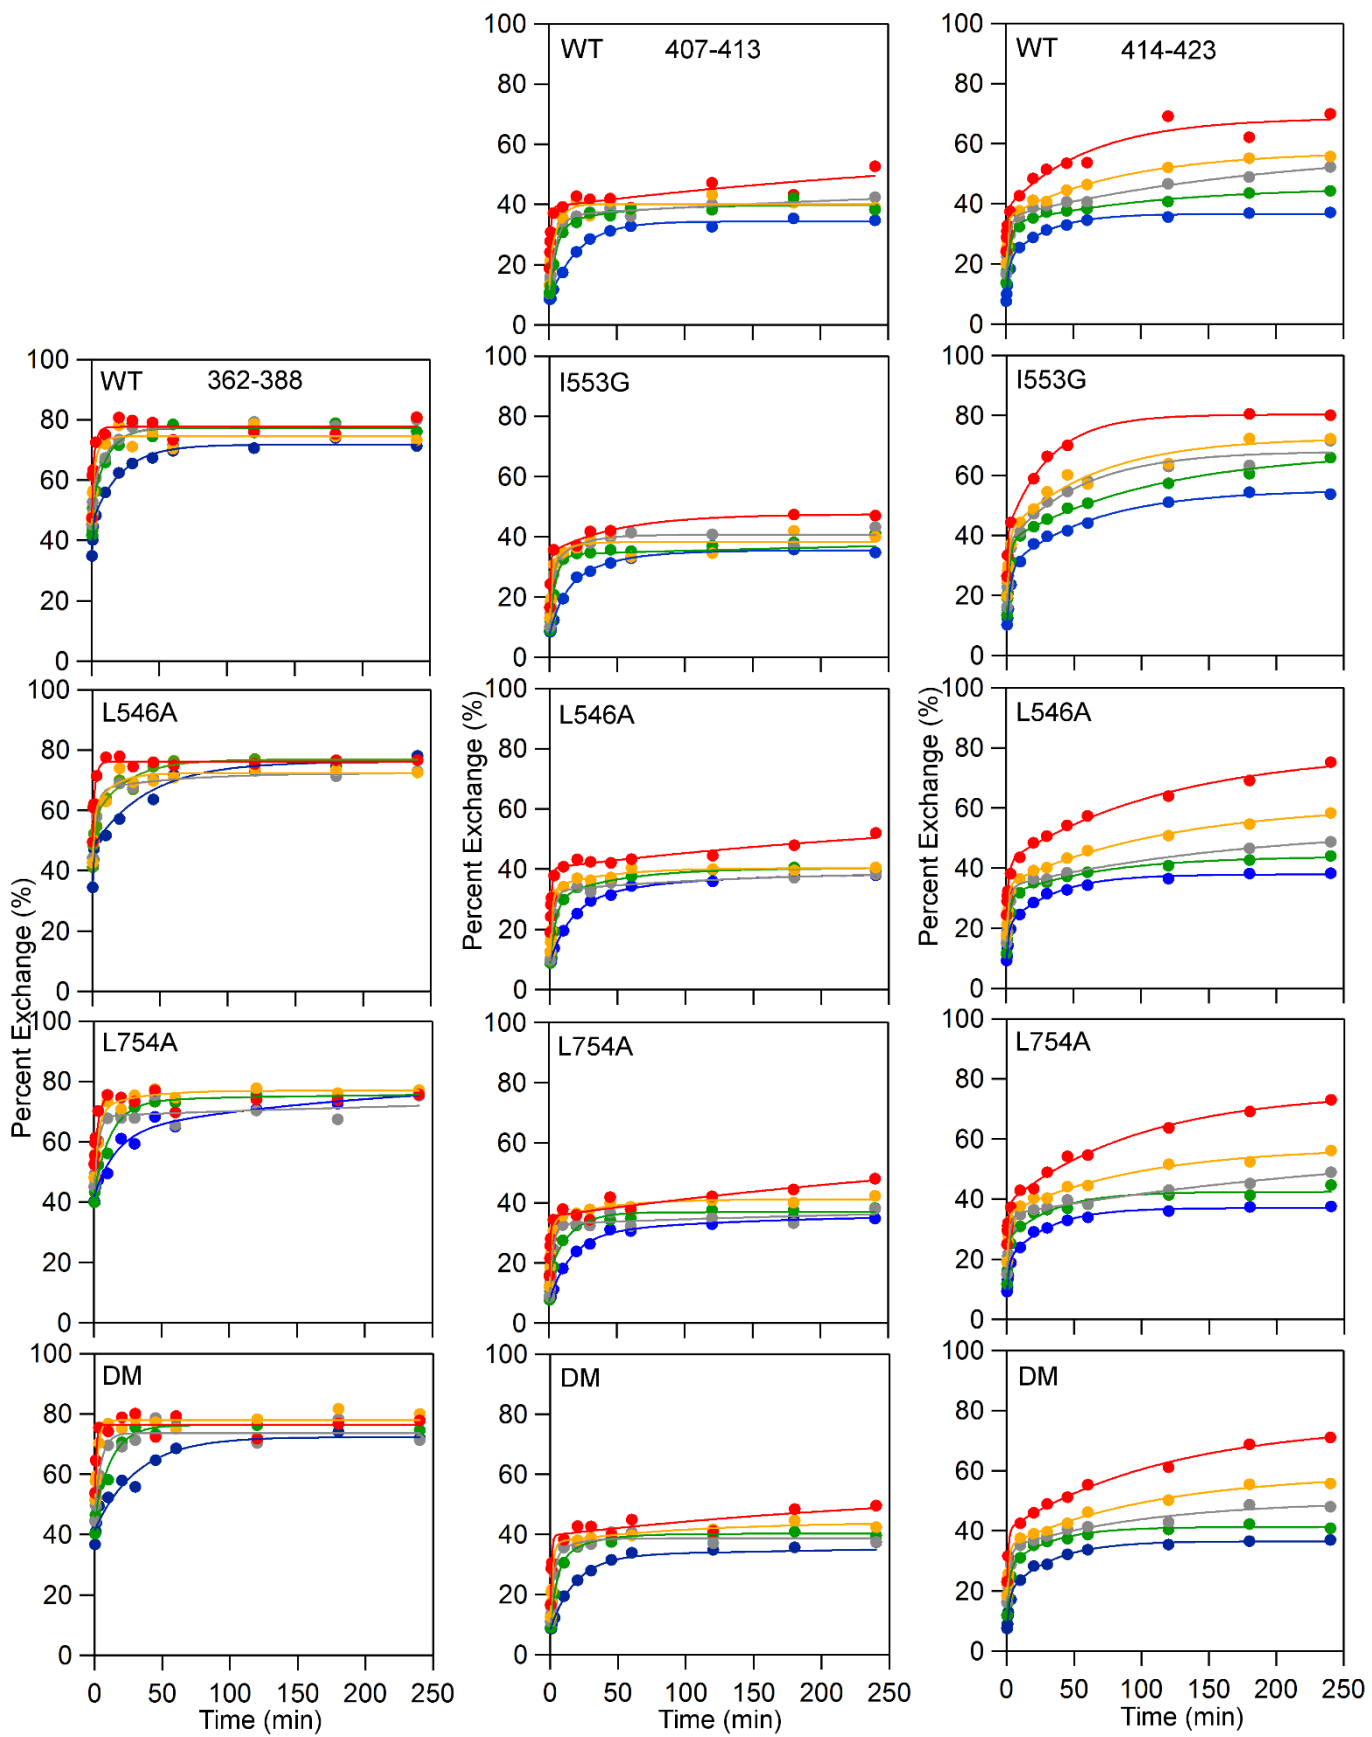

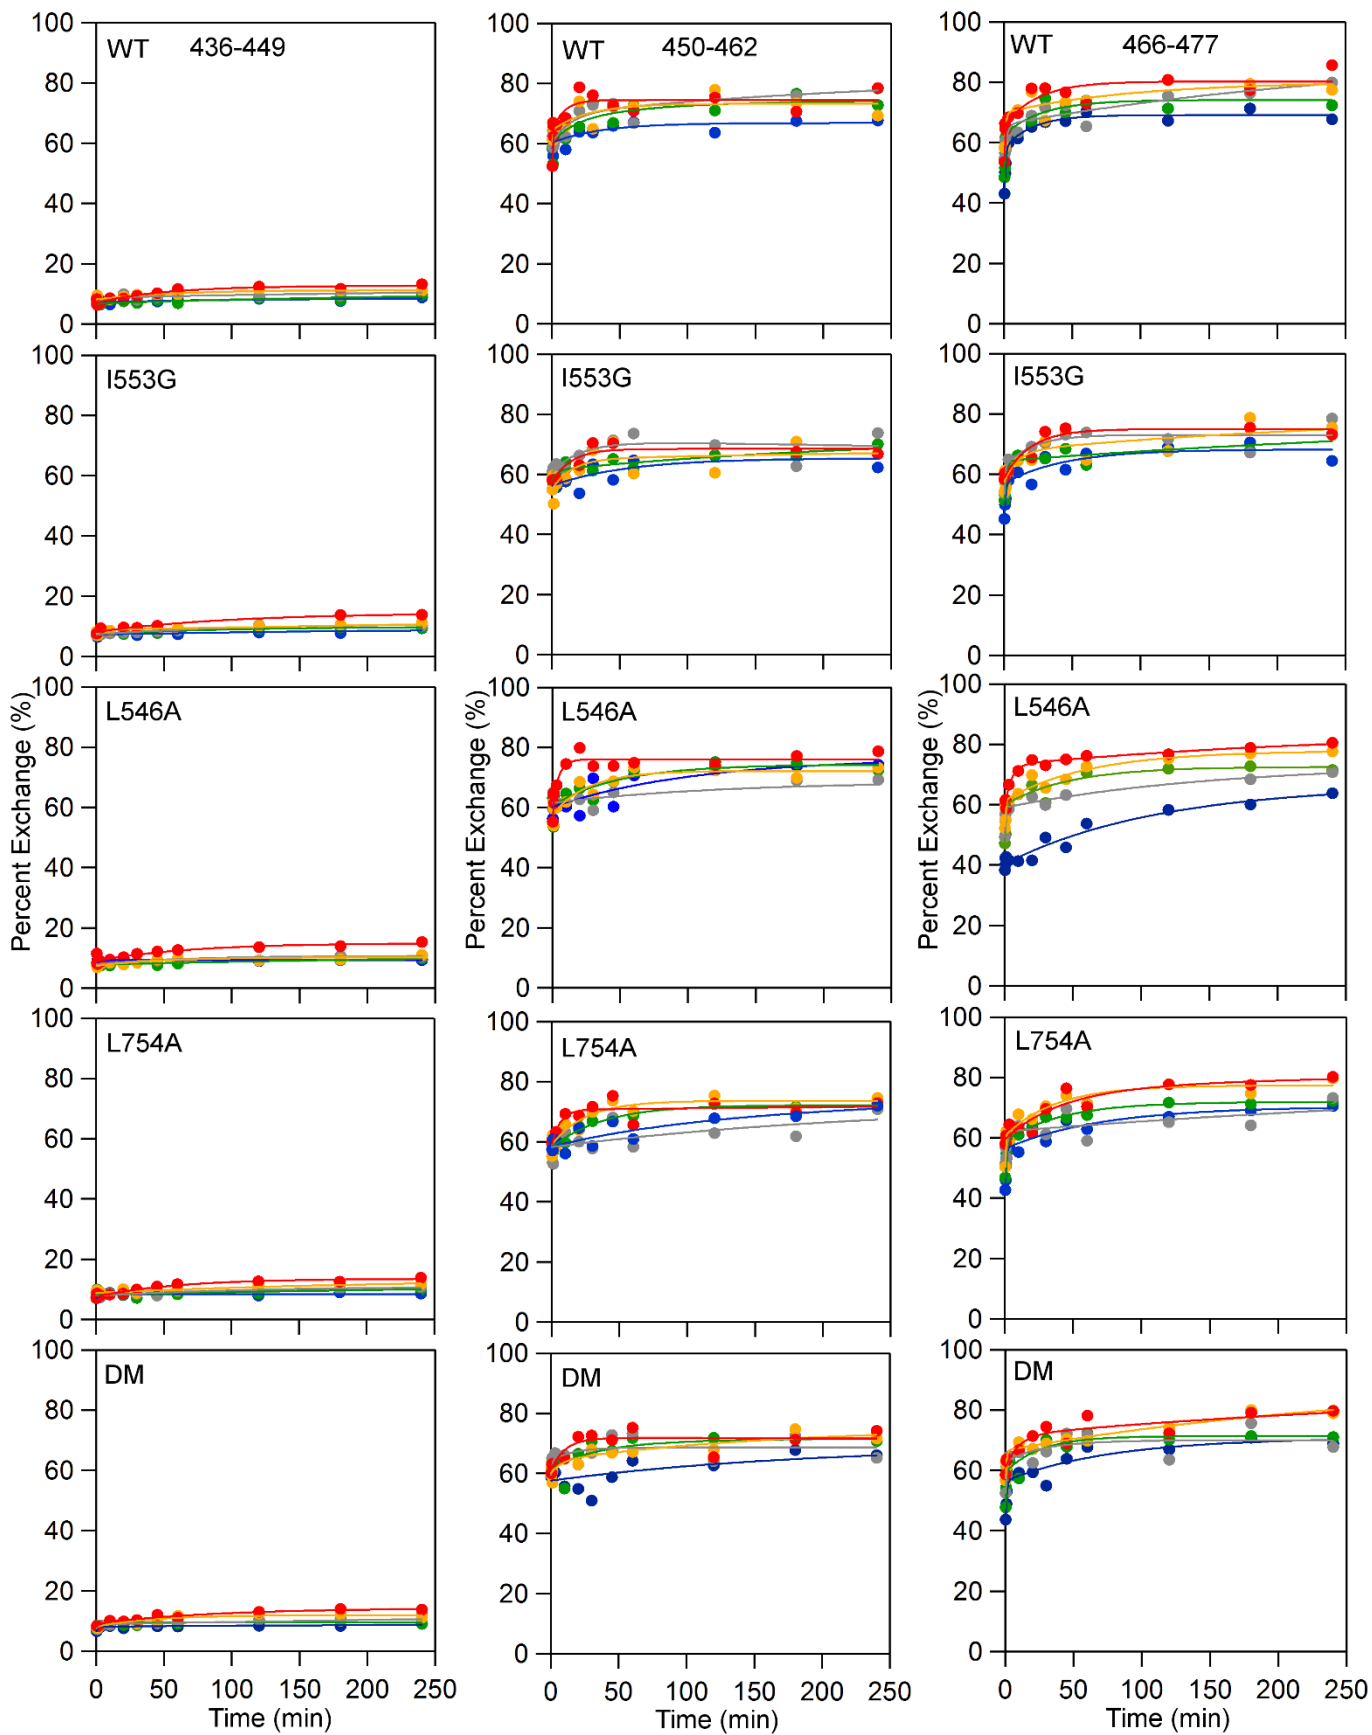

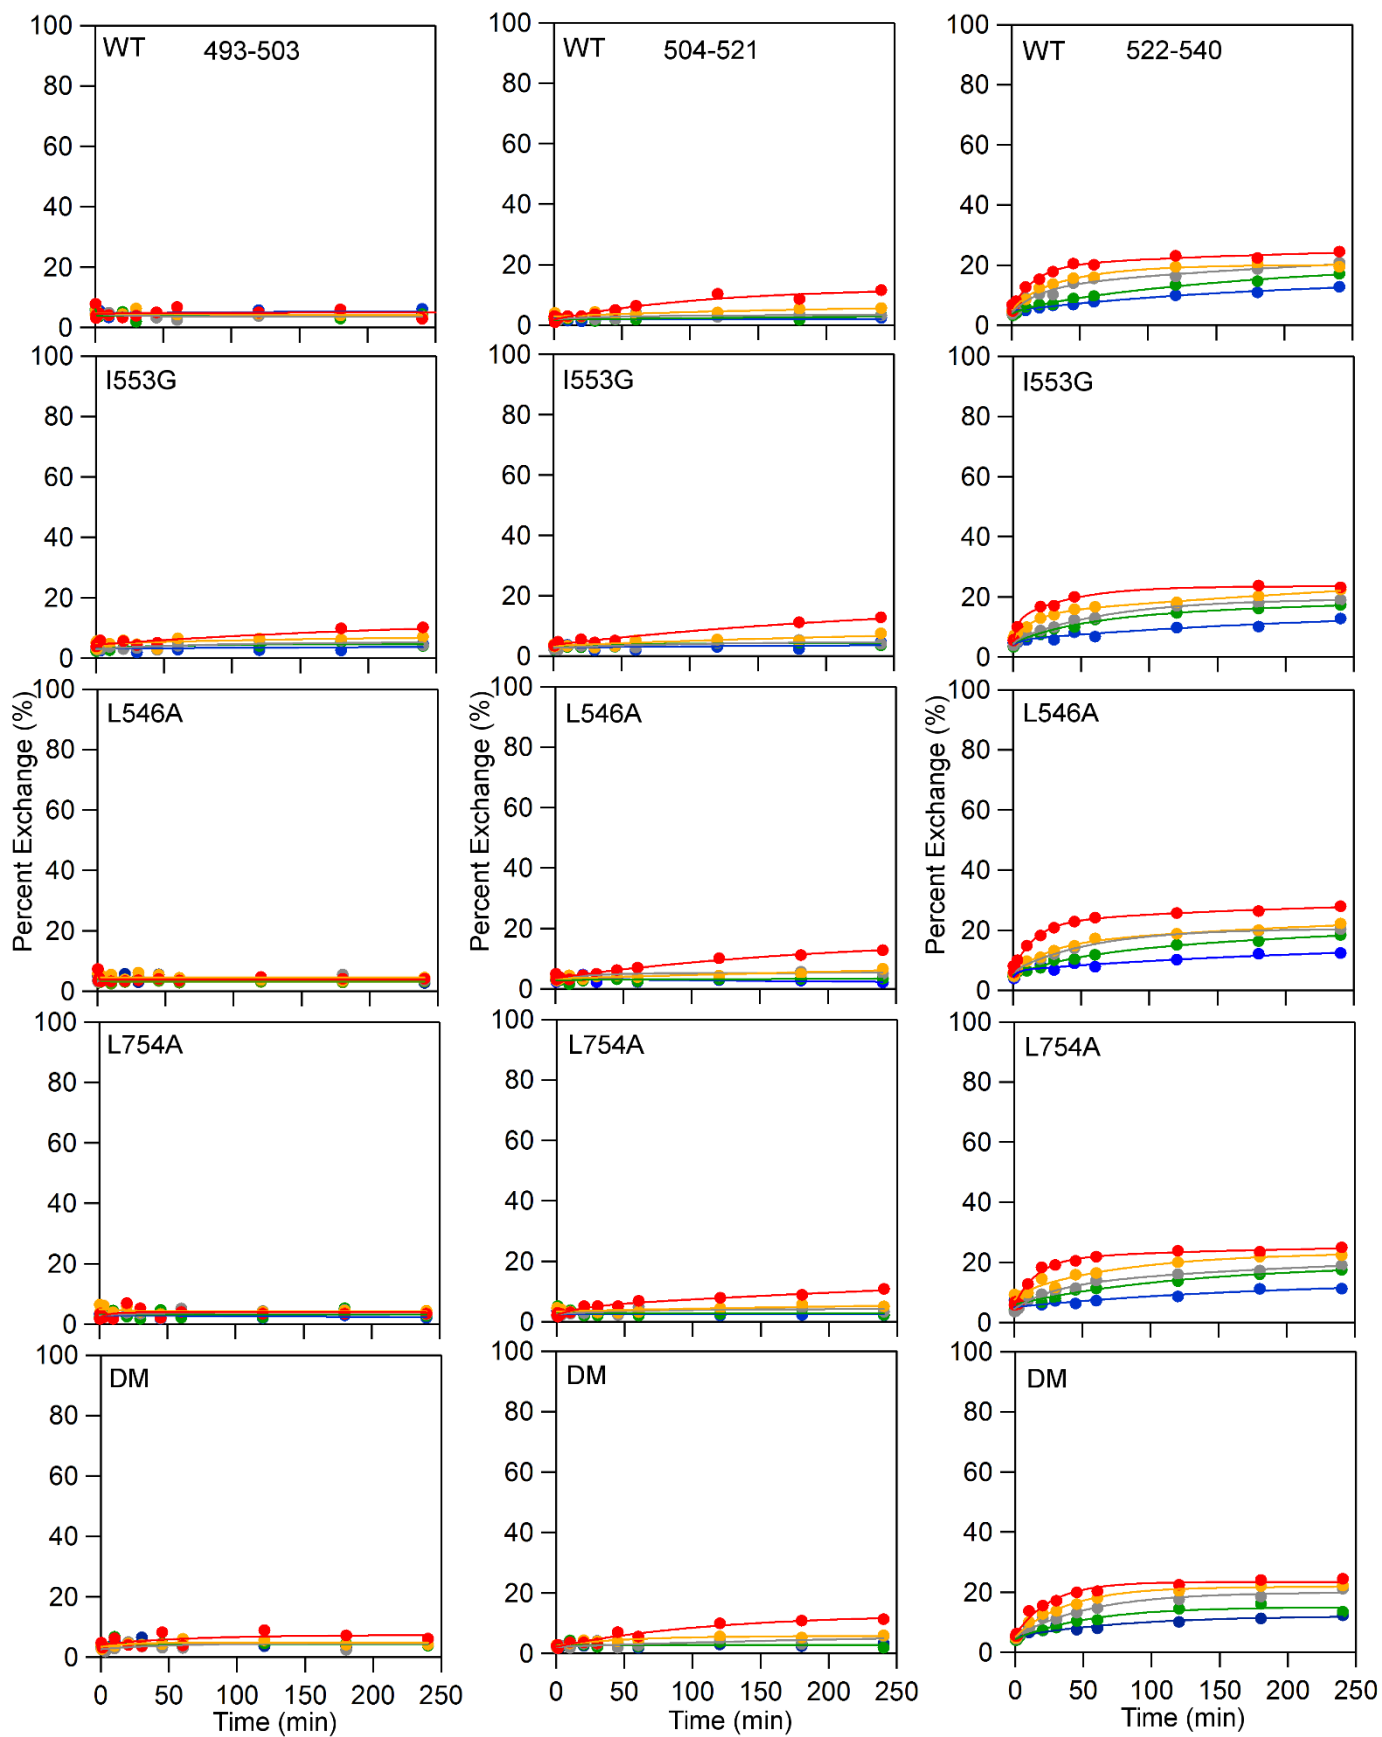

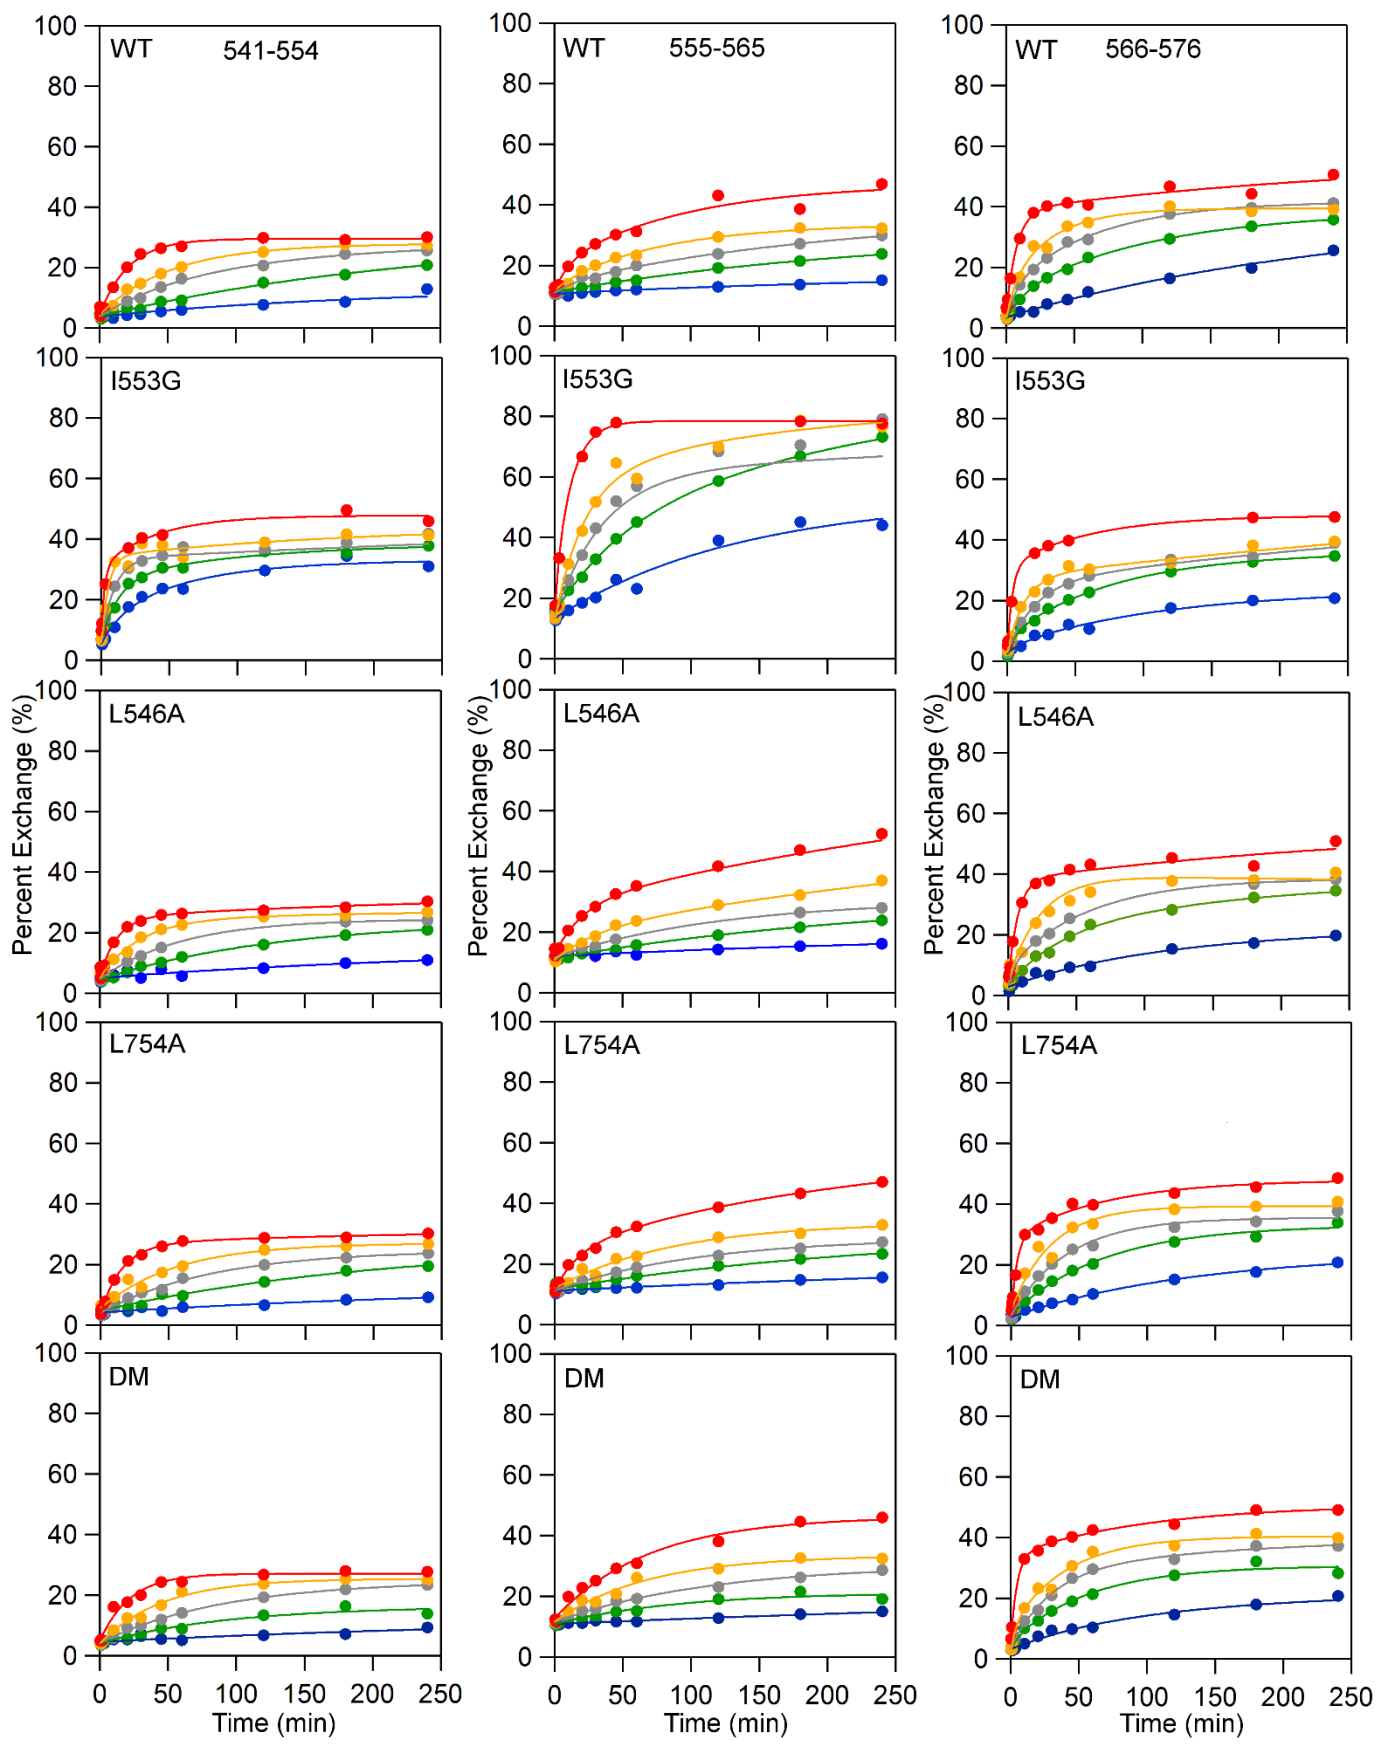

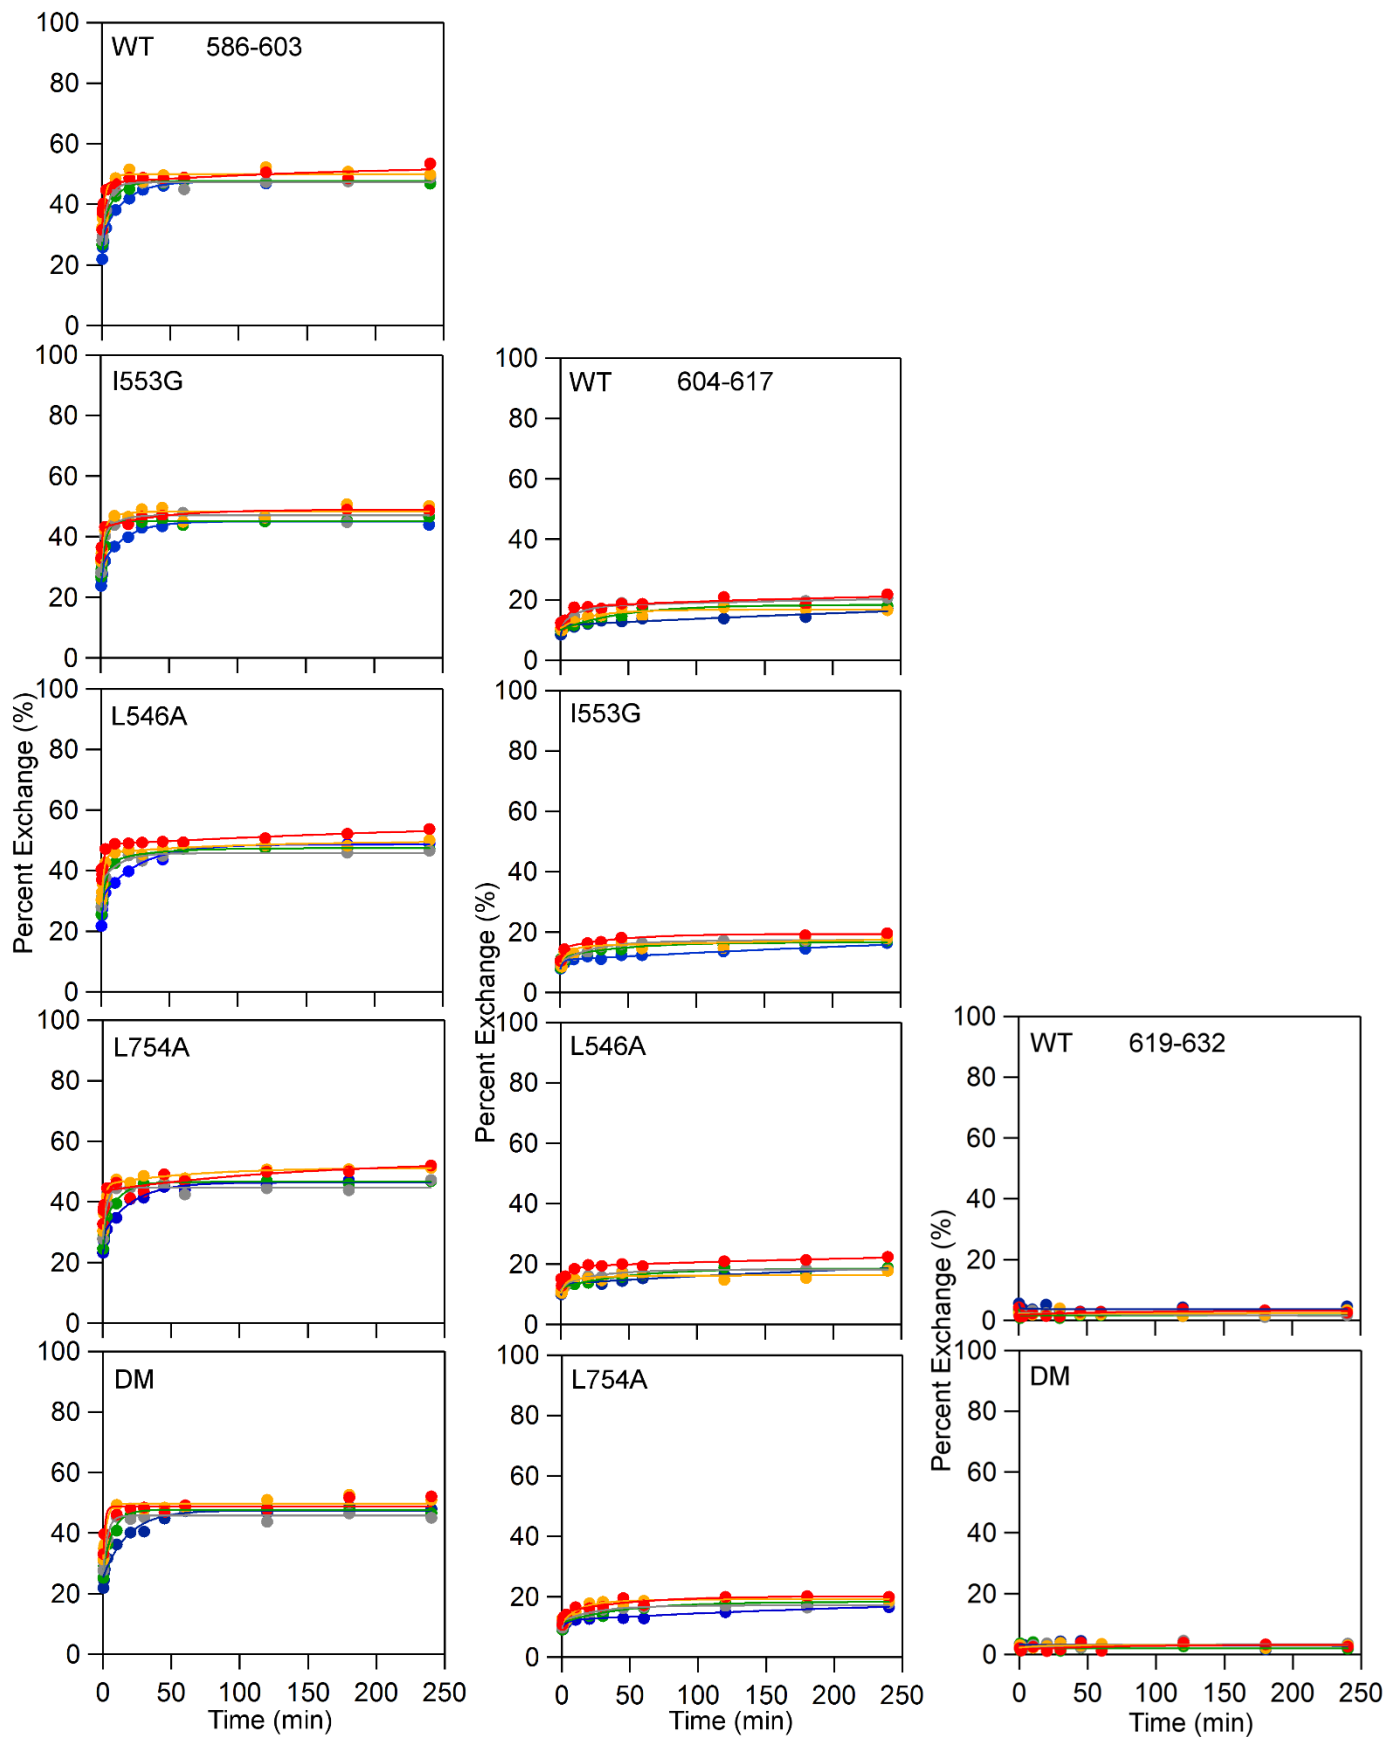

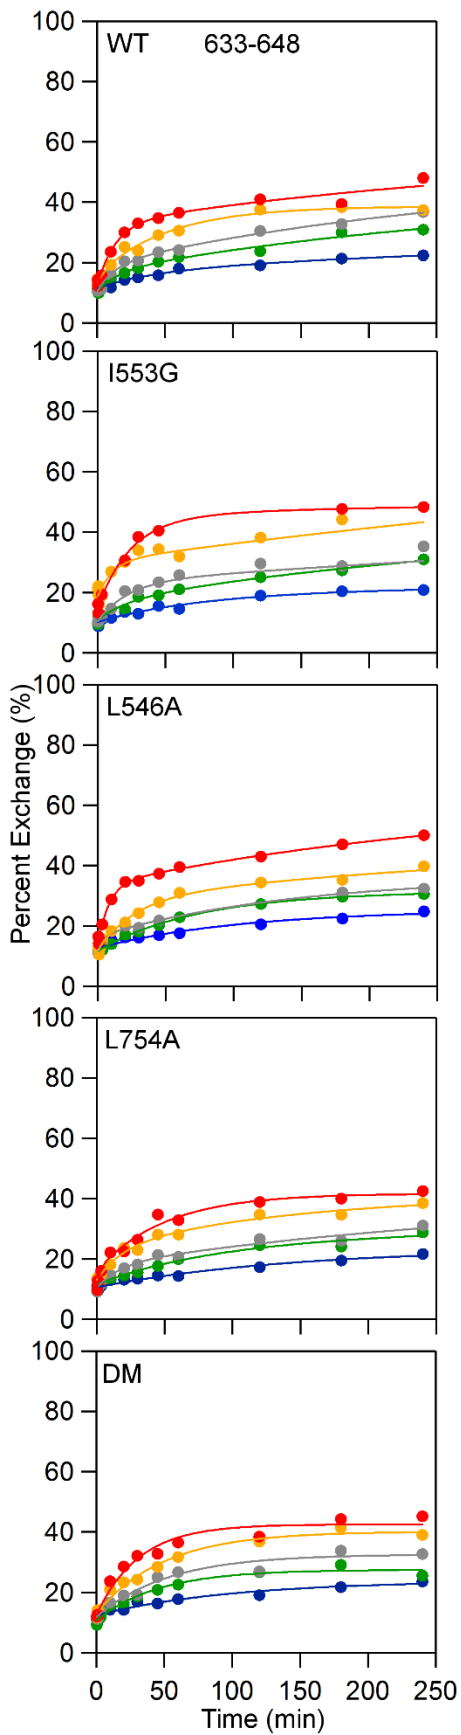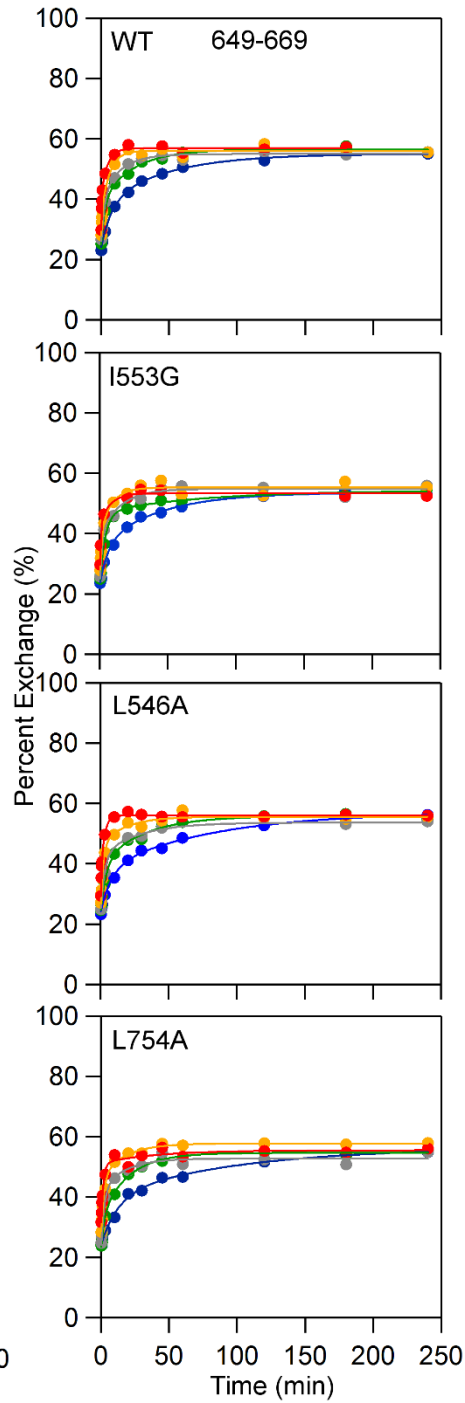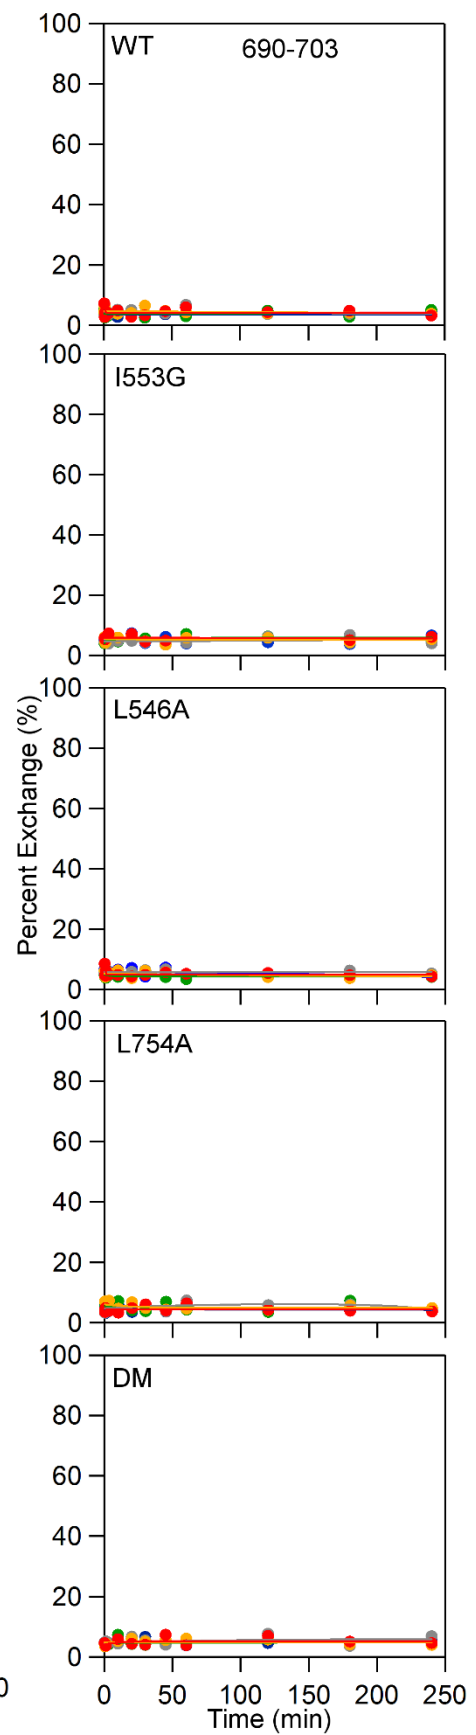

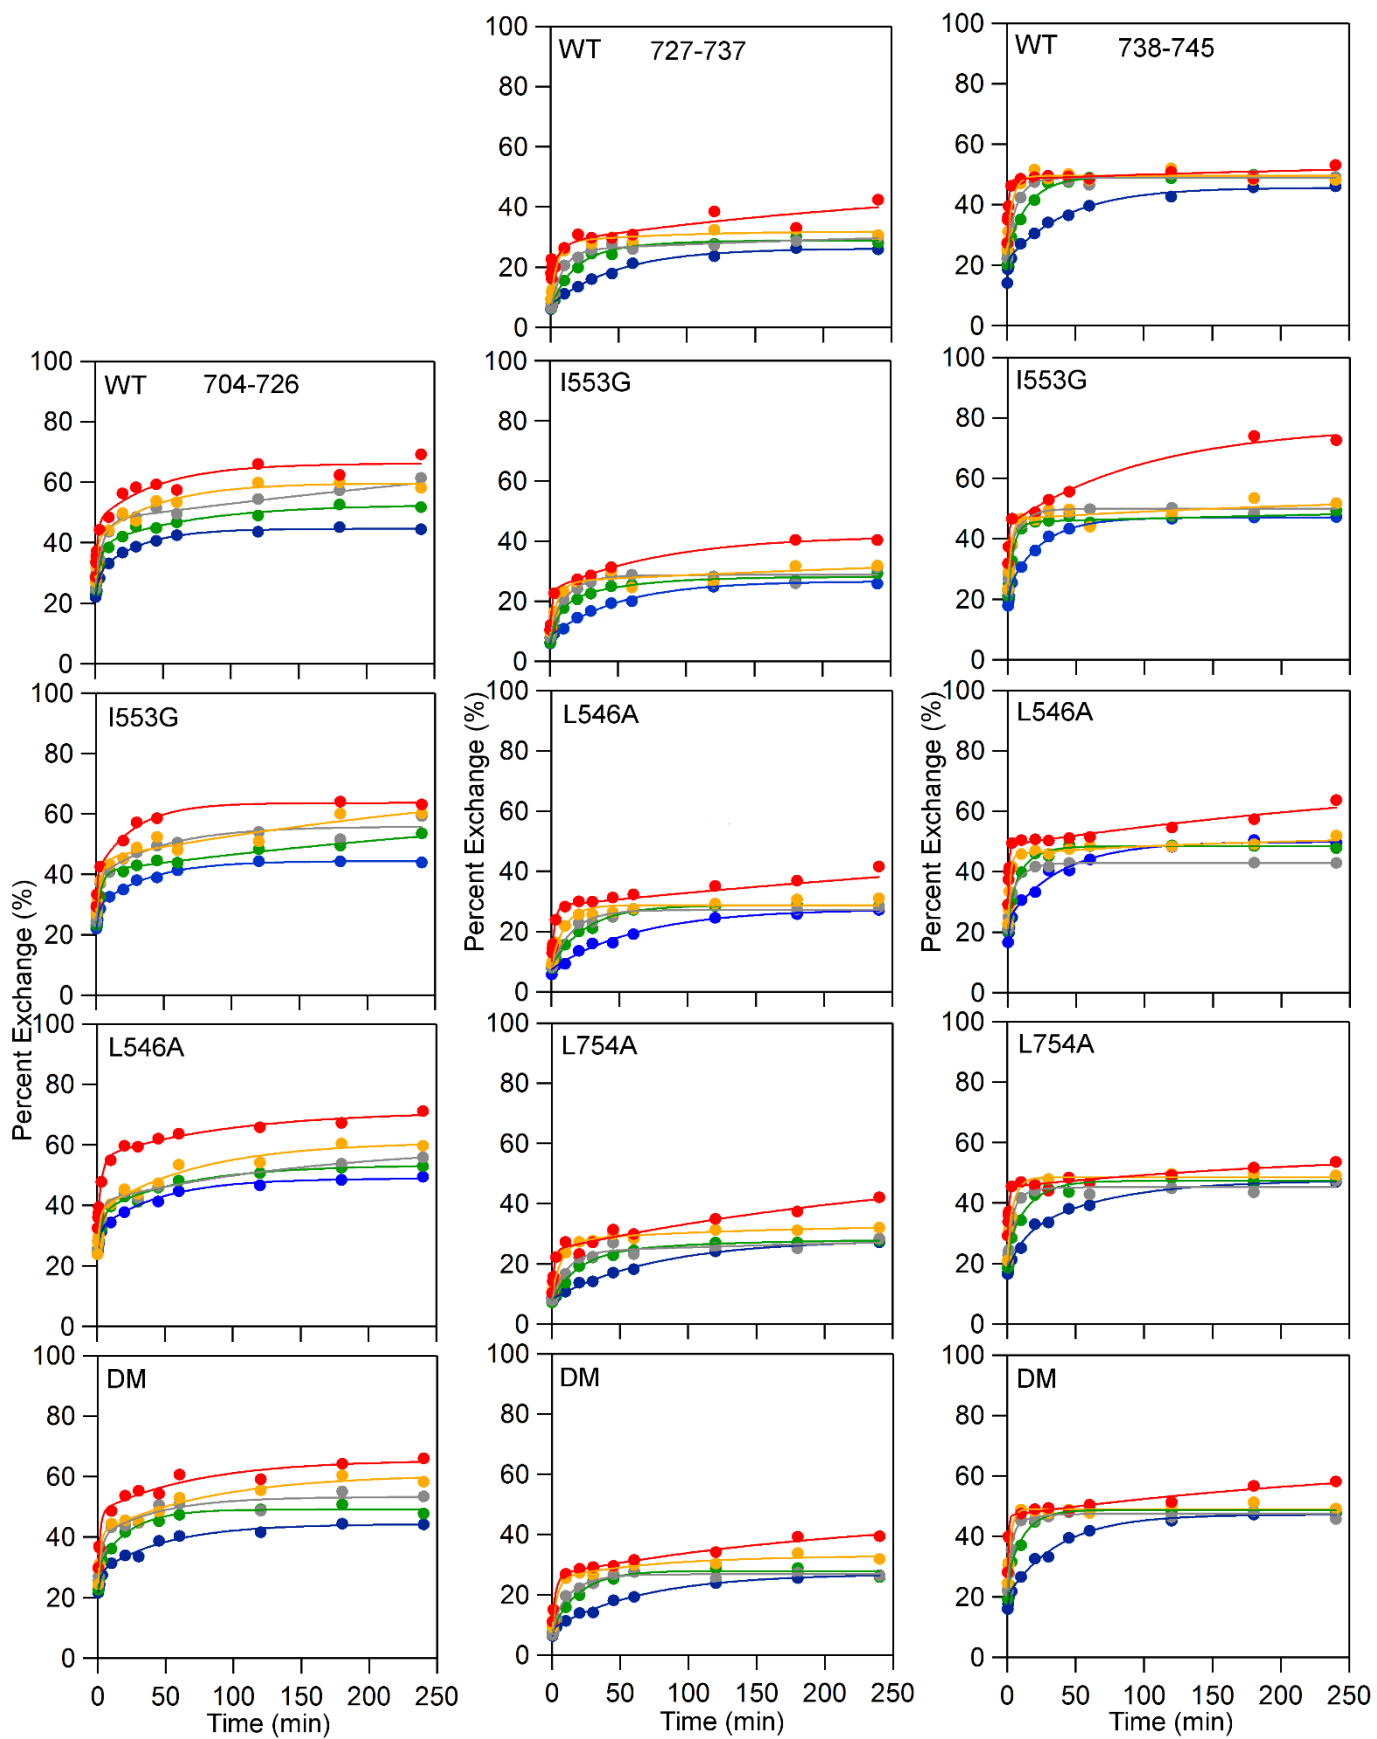

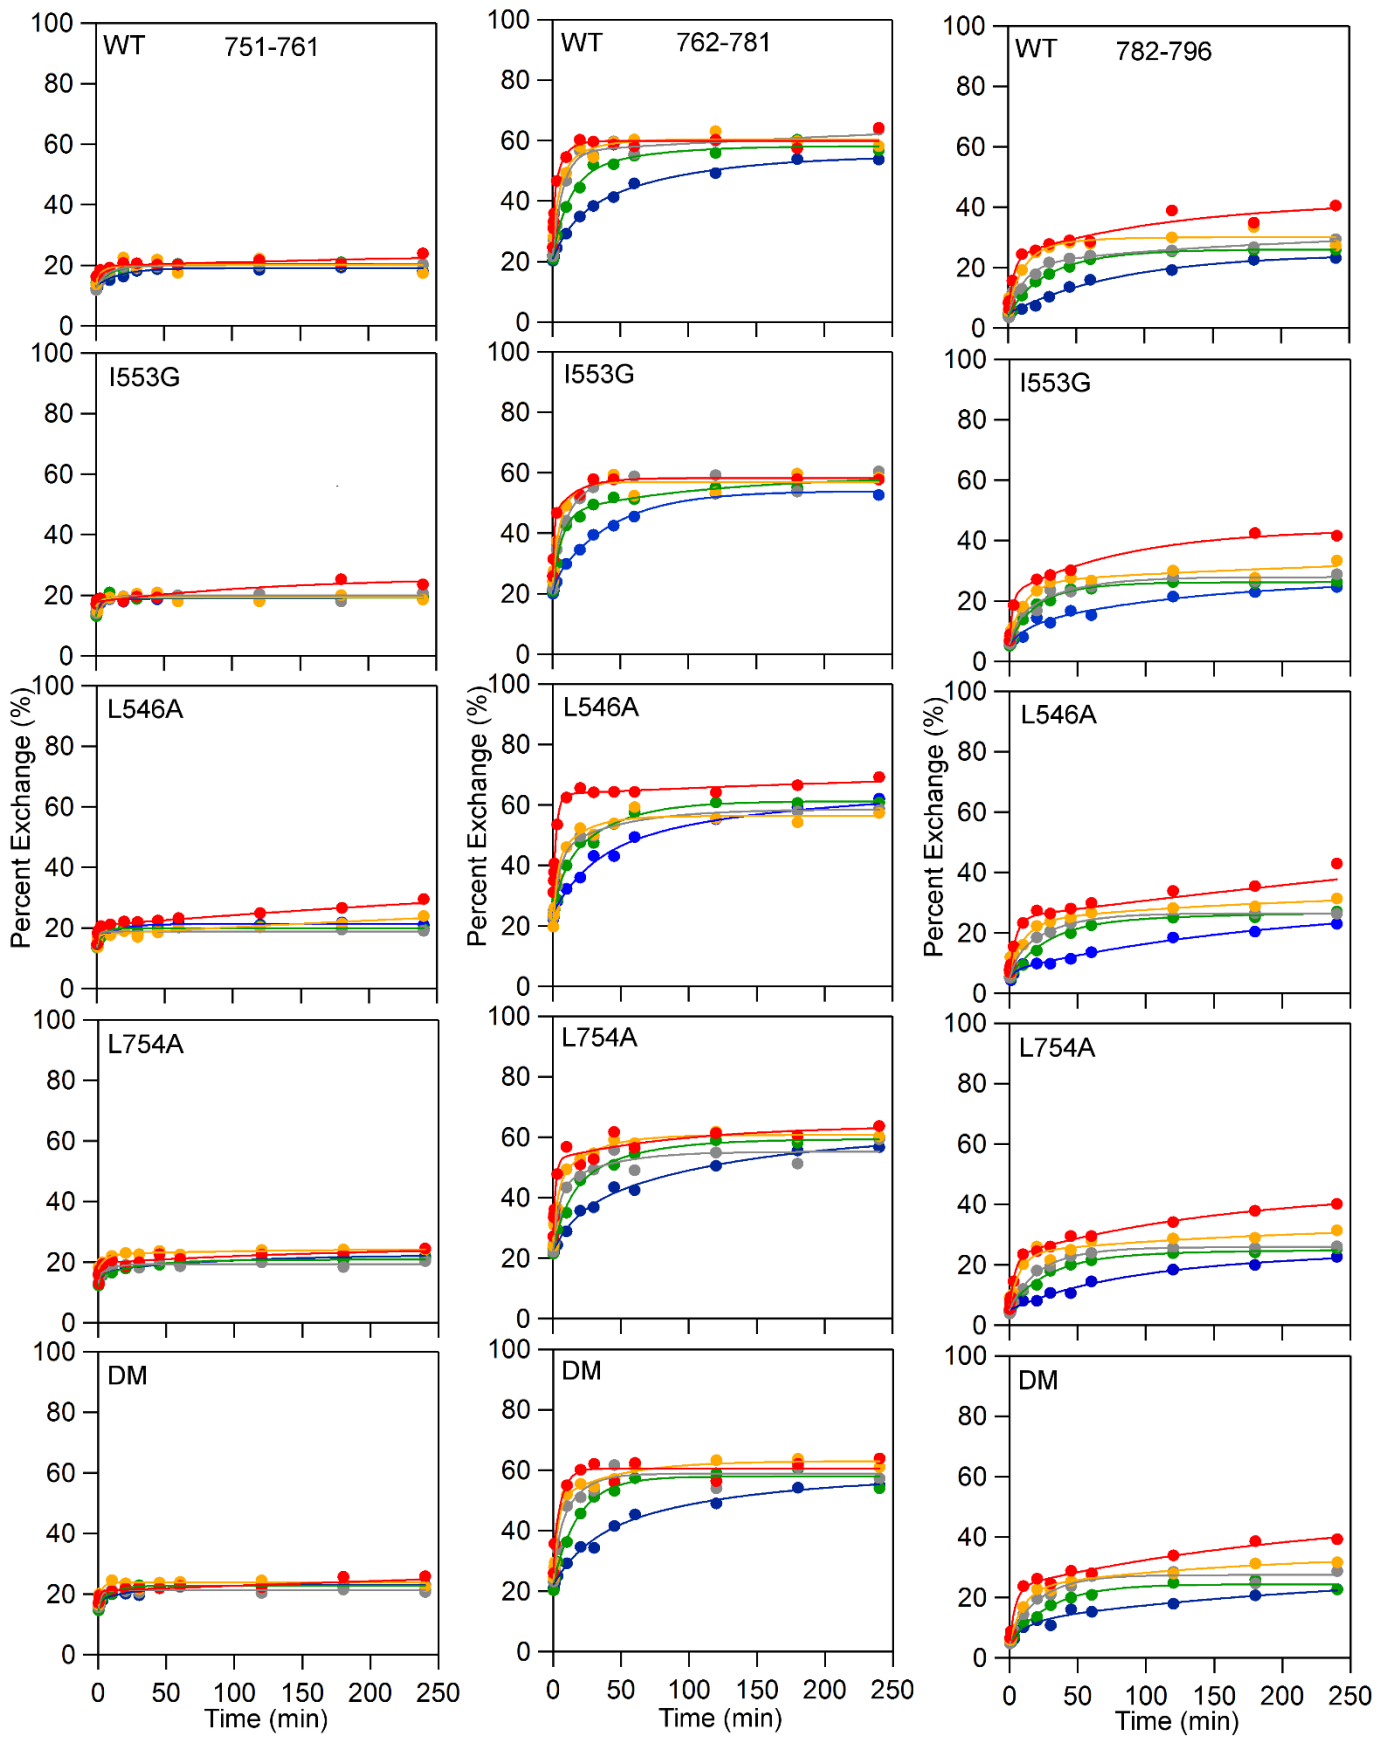



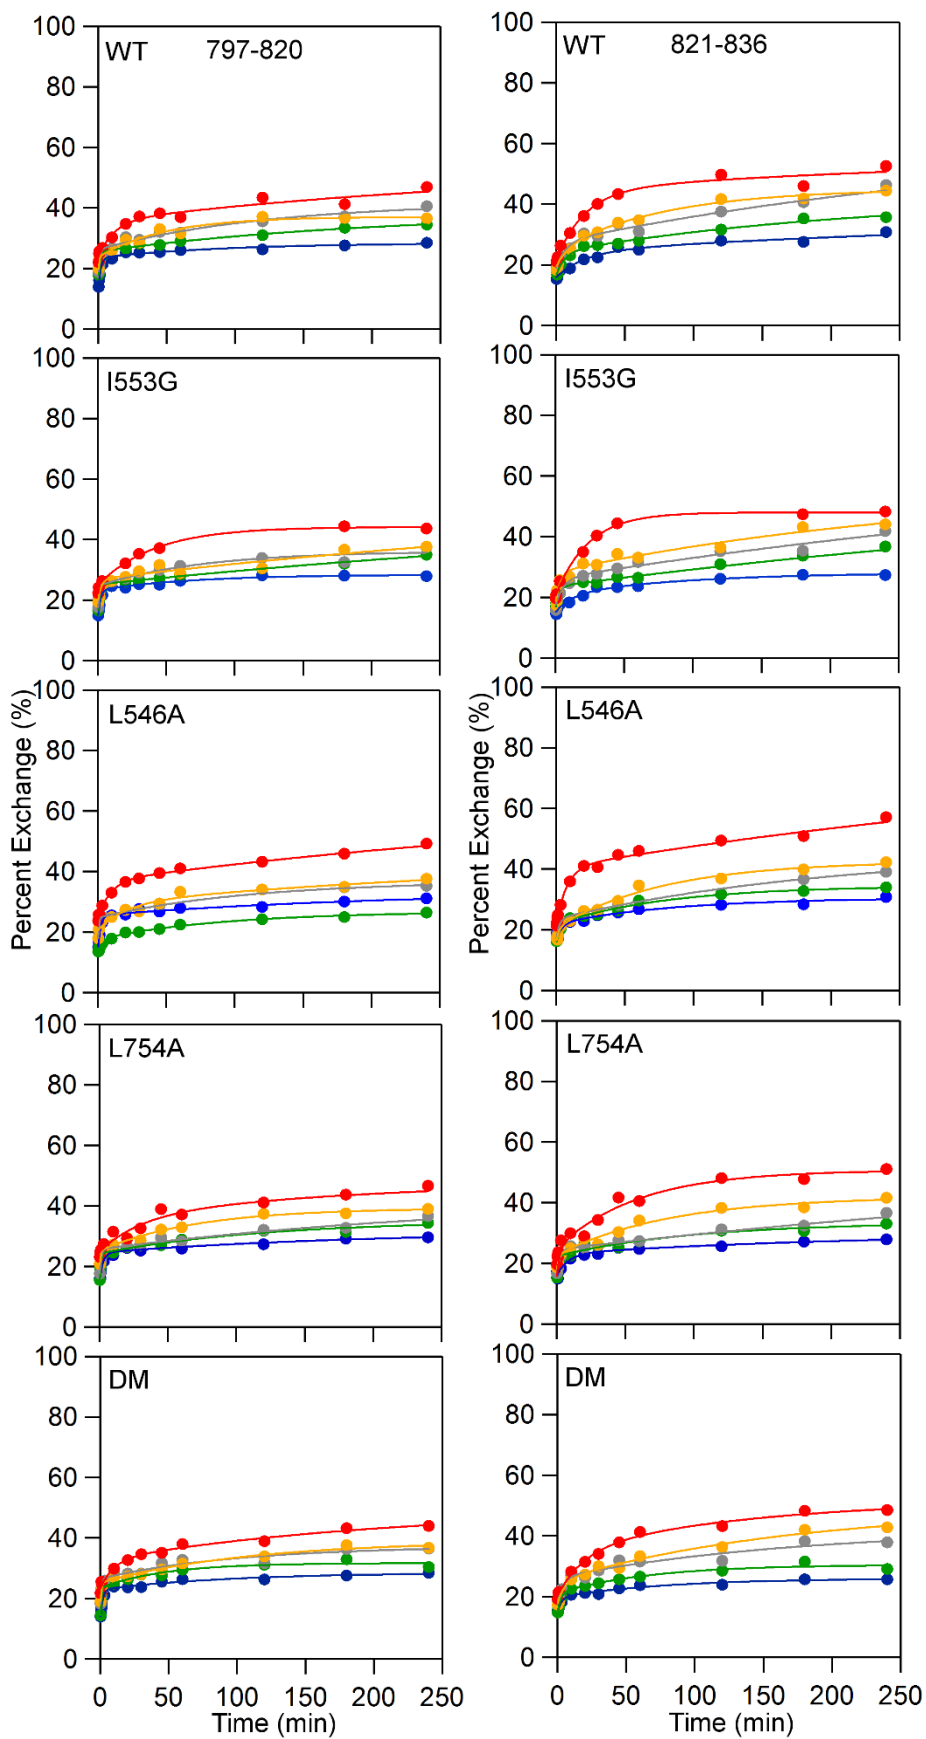

**Figure S1:** Compilation of the complete sets of experimental HDXMS traces for WT, I553G, L546A, L754A and DM.

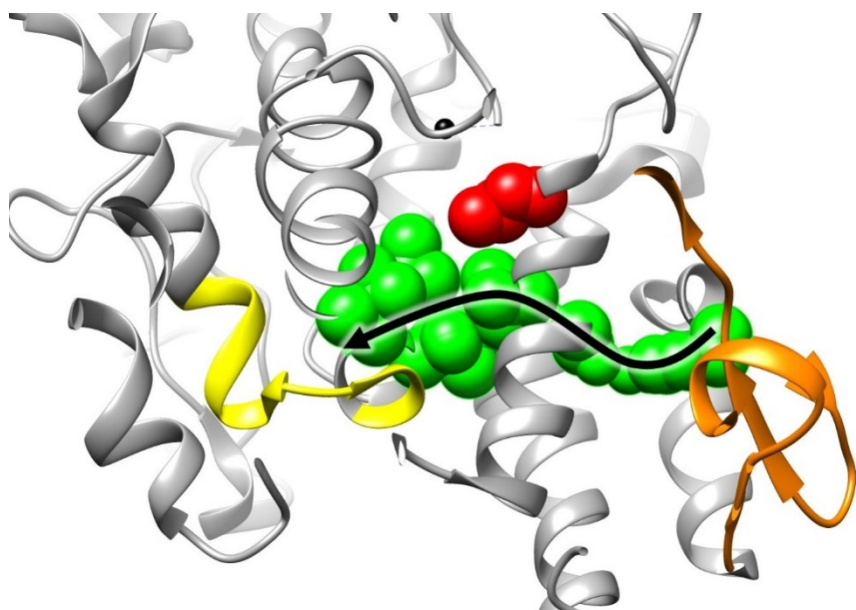

**Figure S2:** Previously identified network connecting the solvent-exposed loop and active site.<sup>6</sup> The active site and surface loop are color coded as yellow (peptide 555-565) and orange (peptide 284-299, 317-334), respectively. The residues Y317, S749, V750, L546 and I553, colored in green and presented in the space-filling mode, have been assigned to the connectivity for the thermal activation from solvent interface to active site. The L754 (colored in red) is outside the network.<sup>6</sup>

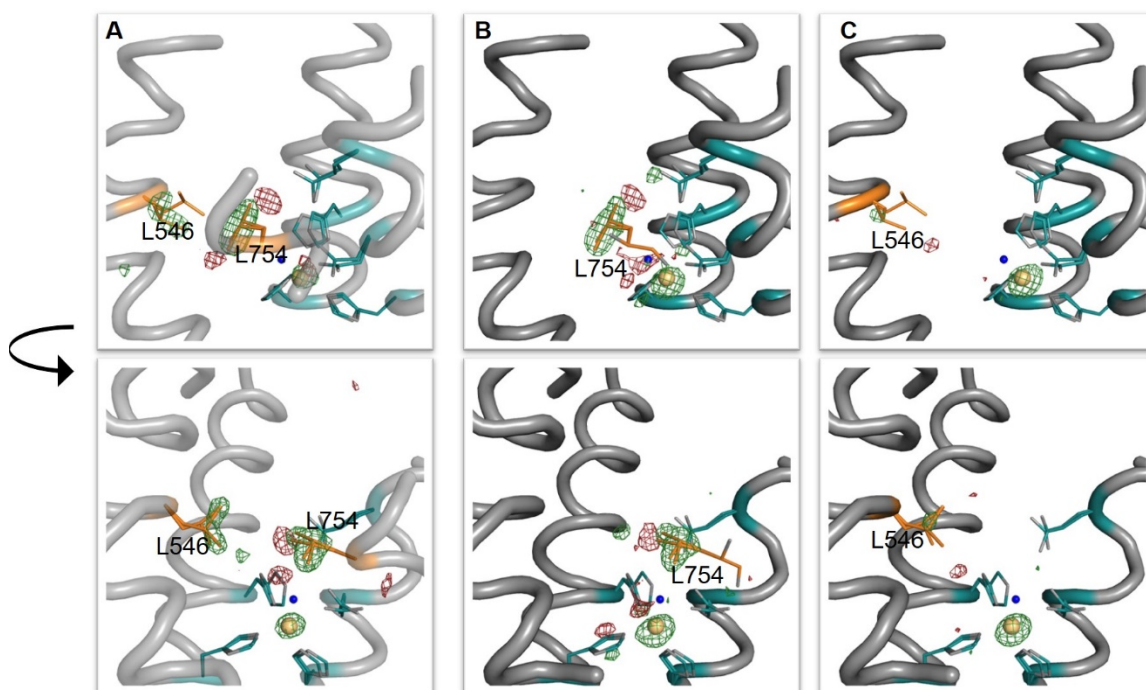

**Figure S3:** Isomorphous difference map for room temperature structures (A) WT – DM; (B) WT – L754A; (C) WT – L546A. Shown in red (negative) and green (positive) is the WT – mutant isomorphous difference map contoured at  $0.33 \text{ e}/\text{\AA}^3$ . Ligands to the iron (gold sphere) are in teal, and residues 546 and 754 are in orange. The map shows slightly higher iron occupancy in WT. Two views for each mutant are shown separately in the upper and lower panels.

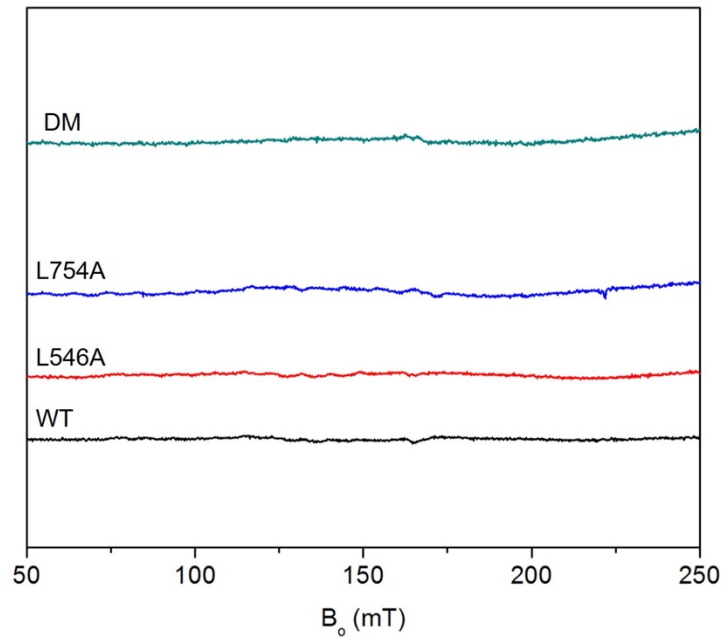

**Figure S4:** EPR spectra of resting (reduced) WT, L546A, L754A and DM SLO-1 (140  $\mu$ M) in 0.1 M potassium phosphate pH = 7.0 buffer. The peak intensities here and in other spectra of L546A, L754A and DM have been corrected for the iron content of each variant: WT (0.9), L546A (0.50), L754 (0.70), DM (0.70).

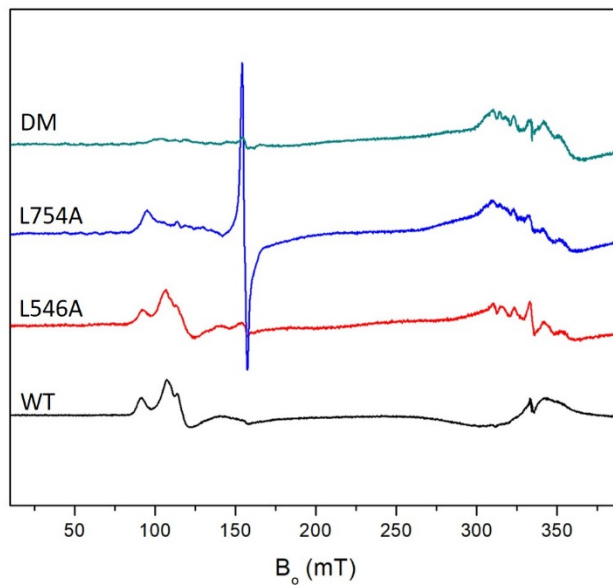

**Figure S5:** Expanded EPR spectra of oxidized WT, L546A, L754A and DM SLO-1, showing the  $g=2$  region. The latter is generally attributed to varying levels of contaminating manganese ion in the protein preparations.

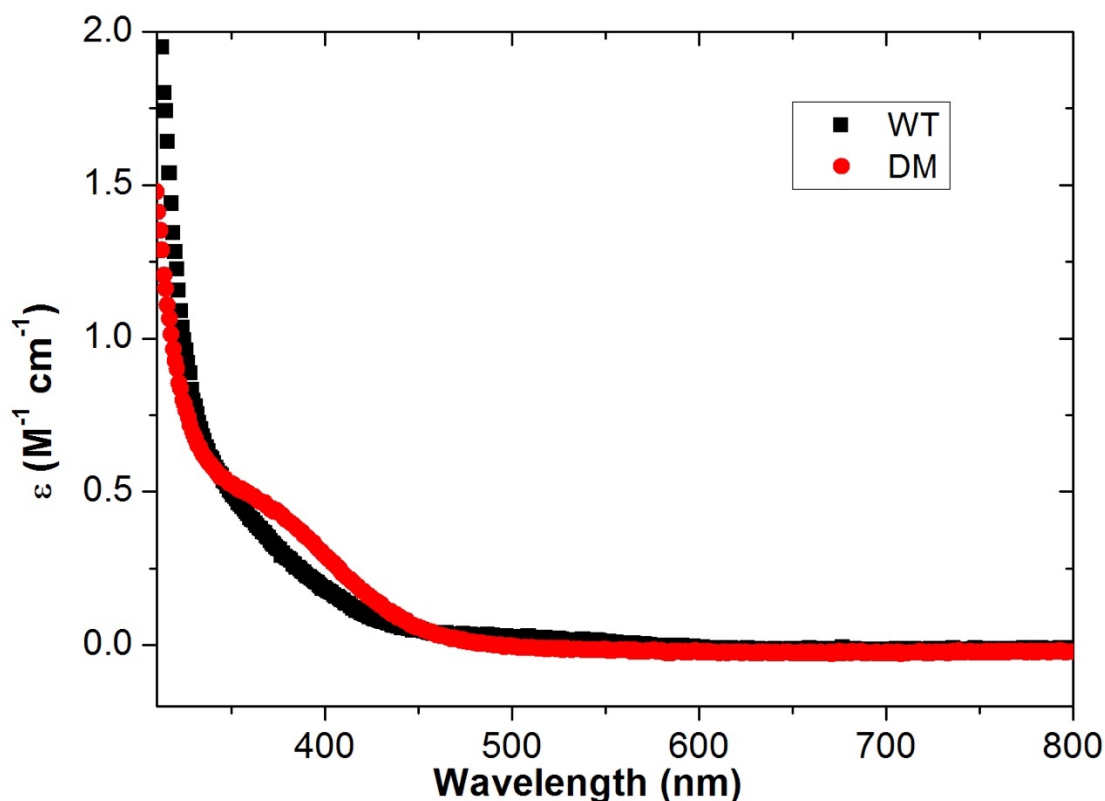

**Figure S6:** Room temperature absorption spectra of the WT and DM Fe(III) lipoxygenase. These traces represent the absorbance following reaction of Fe(II) SLO and linoleic acid, corrected for each enzyme sample Fe(II) SLO prior to addition of linoleic acid. The absorption spectrum for lineoleic acid is below 240nm. The absorption of DM is after concentration correction due to the reduced iron content (70%) relative to WT (90%).

## References

- (1) Knapp, M. J.; Rickert, K.; Klinman, J. P., Temperature-Dependent Isotope Effects in Soybean Lipoxygenase-1: Correlating Hydrogen Tunneling with Protein Dynamics. *J. Am. Chem. Soc.* **2002**, *124*, 3865-3874.
- (2) Meyer, M. P.; Tomchick, D. R.; Klinman, J. P., Enzyme Structure and Dynamics Affect Hydrogen Tunneling: The Impact of a Remote Side Chain (1553) in Soybean Lipoxygenase-1. *Proc. Natl. Acad. Sci. U.S.A.* **2008**, *105*, 1146-1151.
- (3) Hu, S.; Soudackov, A. V.; Hammes-Schiffer, S.; Klinman, J. P., Enhanced Rigidity within a Double Mutant of Soybean Lipoxygenase Provides Experimental Support for Vibronically Nonadiabatic Proton-Coupled Electron Transfer Models. *ACS Catal.* **2017**, *7*, 3569-3574.
- (4) Hu, S.; Sharma, S. C.; Scouras, A. D.; Soudackov, A. V.; Carr, C. A. M.; Hammes-Schiffer, S.; Alber, T.; Klinman, J. P., Extremely Elevated Room-Temperature Kinetic Isotope Effects Quantify the Critical Role of Barrier Width in Enzymatic C-H Activation. *J. Am. Chem. Soc.* **2014**, *136*, 8157-8160.
- (5) Sharma, S. C.; Klinman, J. P., Kinetic Detection of Orthogonal Protein and Chemical Coordinates in Enzyme Catalysis: Double Mutants of Soybean Lipoxygenase. *Biochemistry* **2015**, *54*, 5447-5456.
- (6) Offenbacher, A. R.; Hu, S.; Poss, E. M.; Carr, C. A. M.; Scouras, A. D.; Prigozhin, D. M.; Iavarone, A. T.; Palla, A.; Alber, T.; Fraser, J. S.; Klinman, J. P., Hydrogen-Deuterium Exchange of Lipoxygenase Uncovers a Relationship between Distal, Solvent Exposed Protein Motions and the Thermal Activation Barrier for Catalytic Proton-Coupled Electron Tunneling. *ACS Cent. Sci.* **2017**, *3*, 570-579.
